# Supplementary material for: Structural Insights into Arl1-Mediated Targeting of the Arf-GEF BIG1 to the trans-Golgi
Source: PubMed Central journal article supplement (PMC4956616; doi:10.1016/j.celrep.2016.06.022), 2016-06-30
Supplement: mmc1.pdf [file mmc1.pdf]

Cell Reports, Volume 16

## Supplemental Information

### **Structural Insights into Arl1-Mediated Targeting of the Arf-GEF BIG1 to the *trans*-Golgi**

**Antonio Galindo, Nicolas Soler, Stephen H. McLaughlin, Minmin Yu, Roger L. Williams, and Sean Munro**

**A**

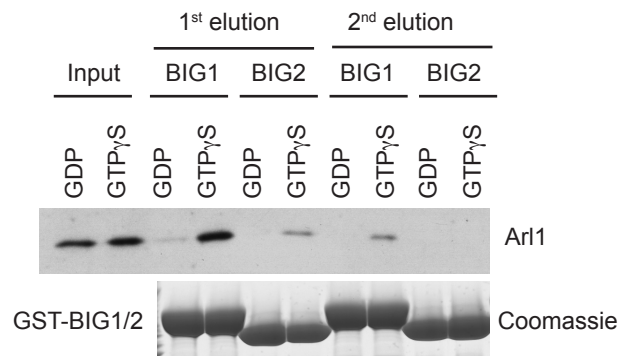

**B**

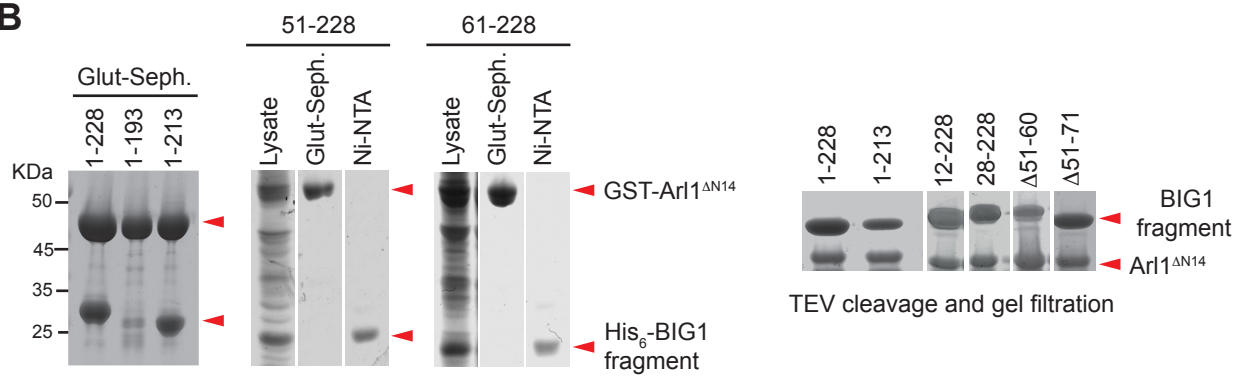

Figure S2

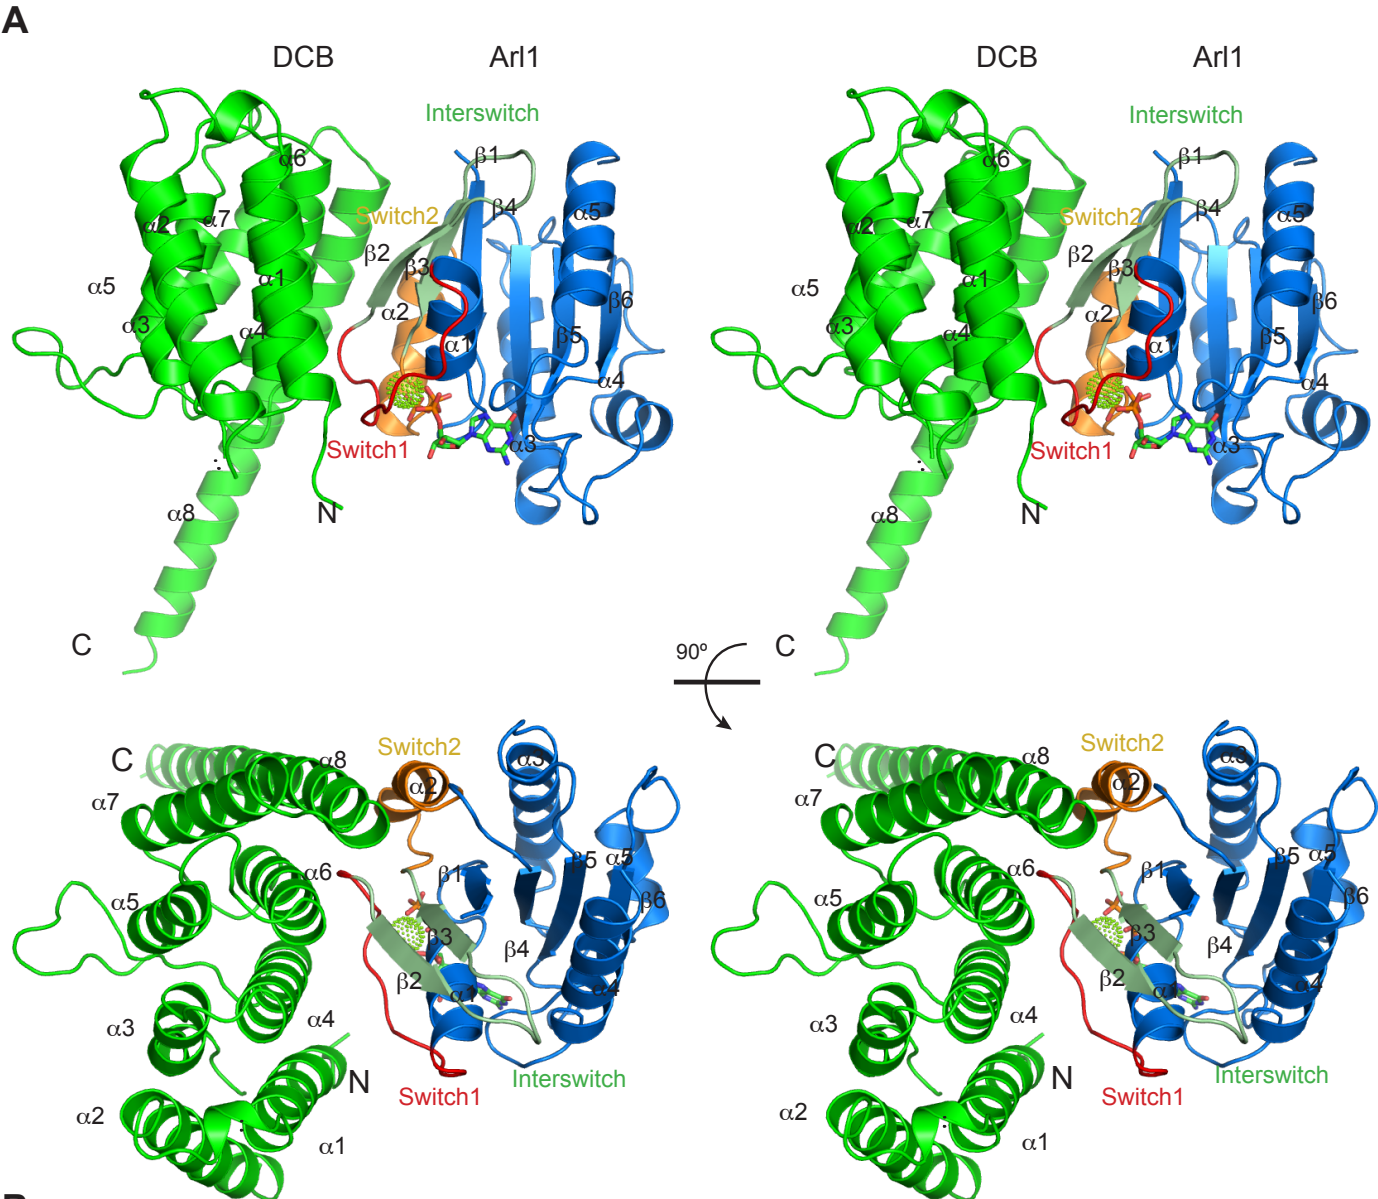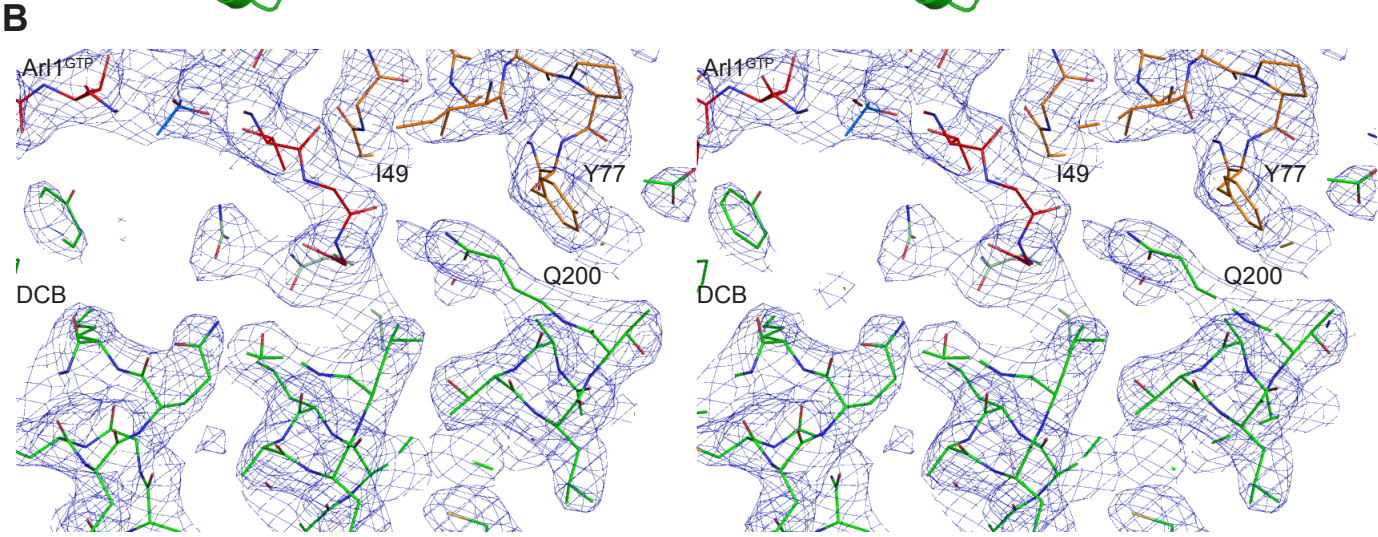

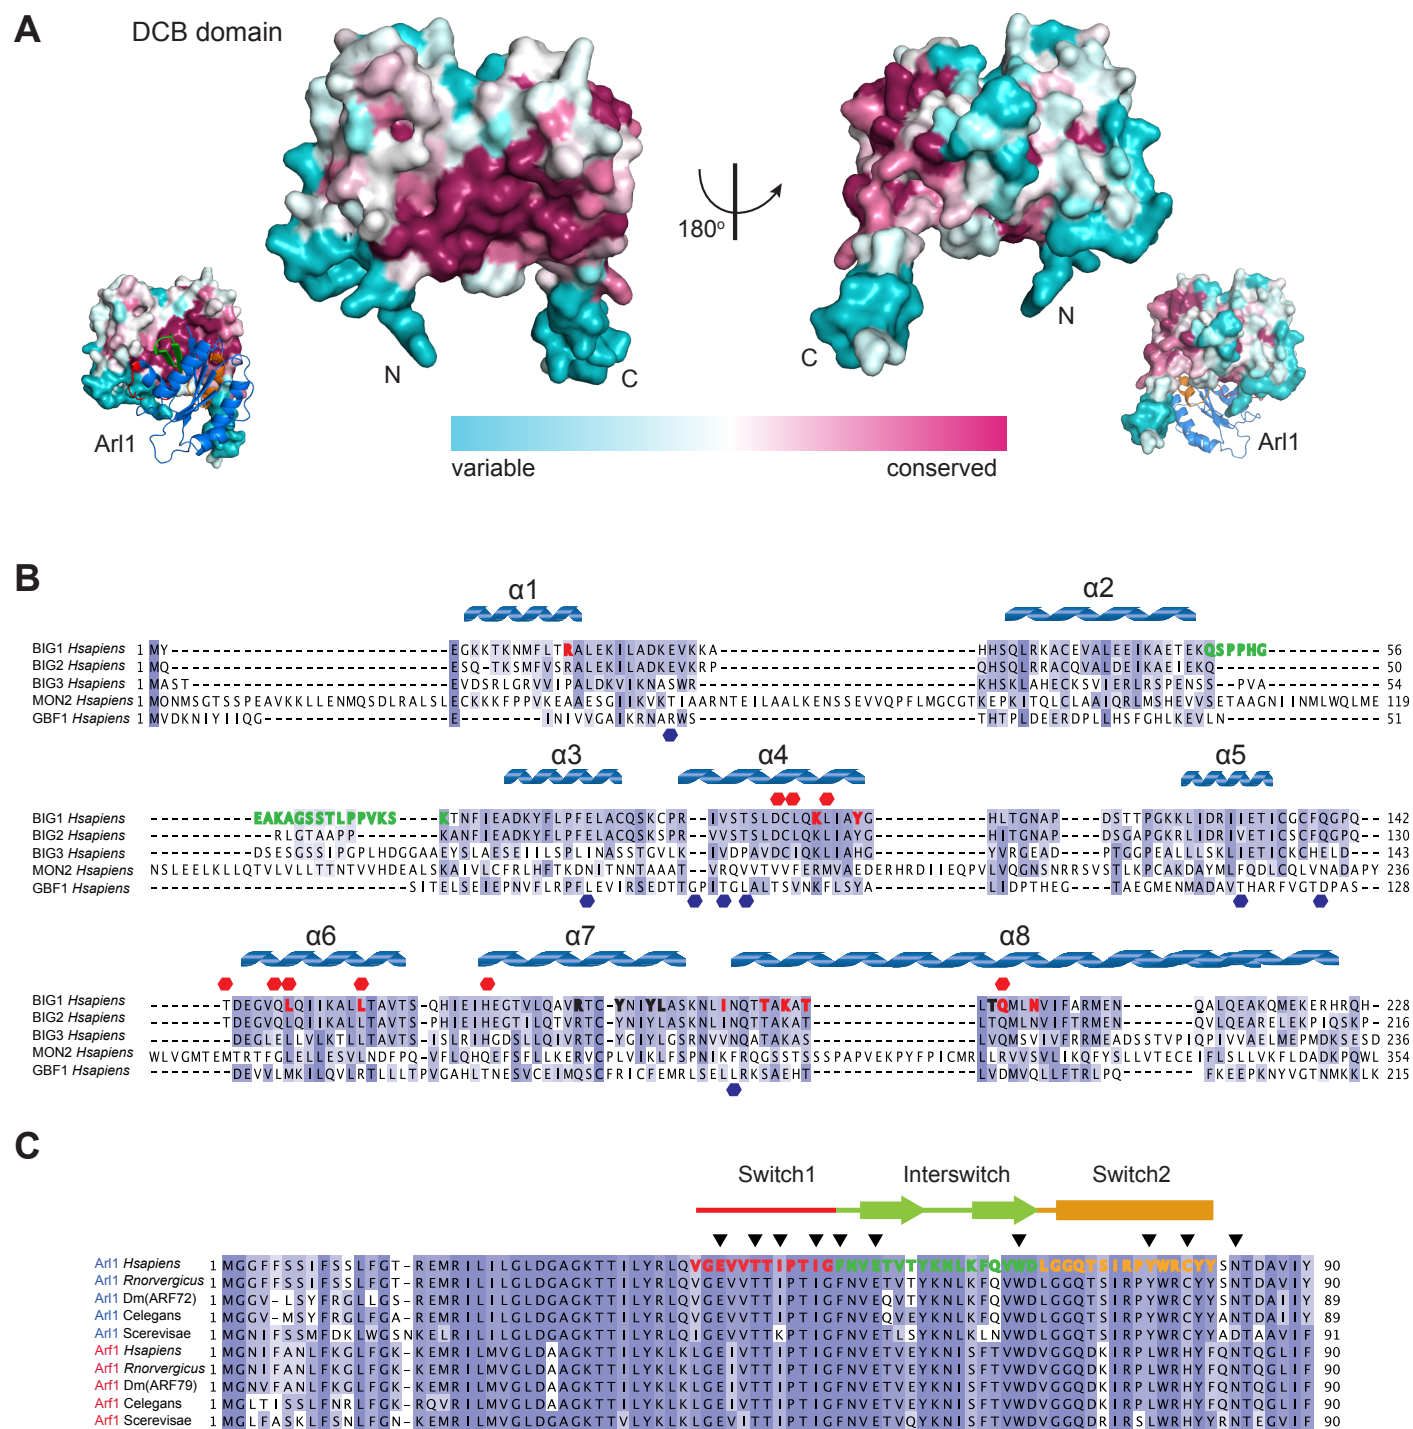

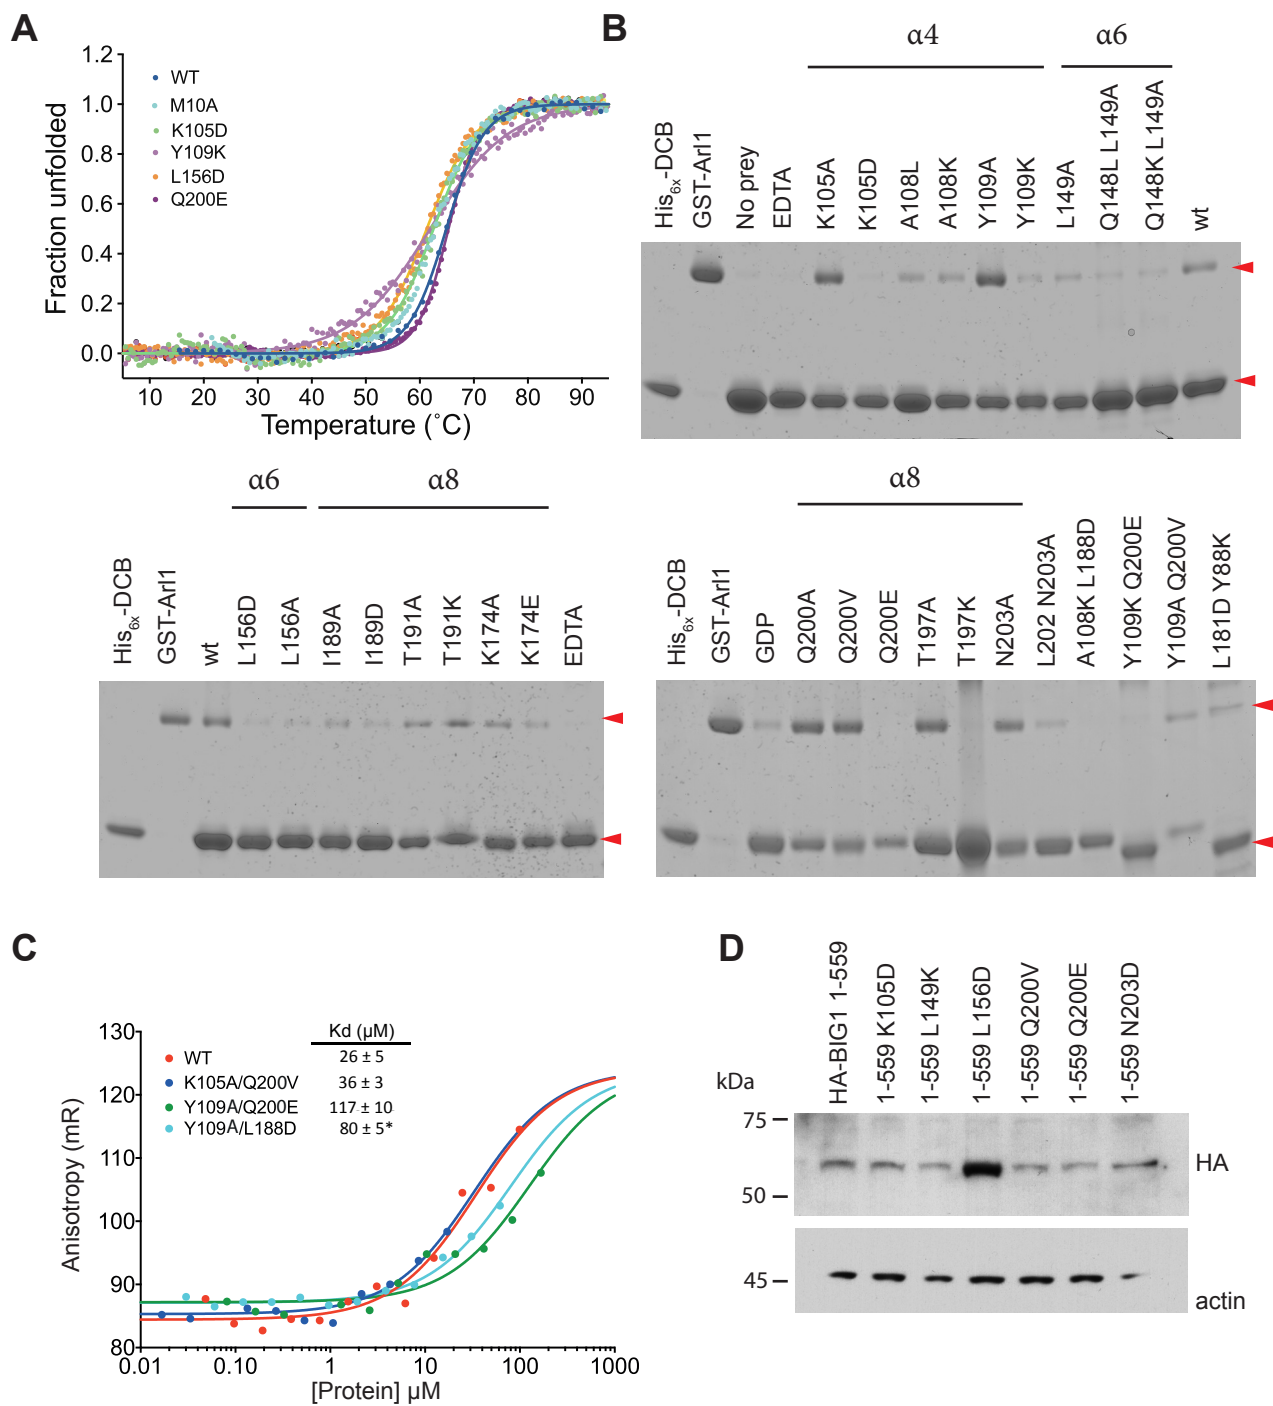



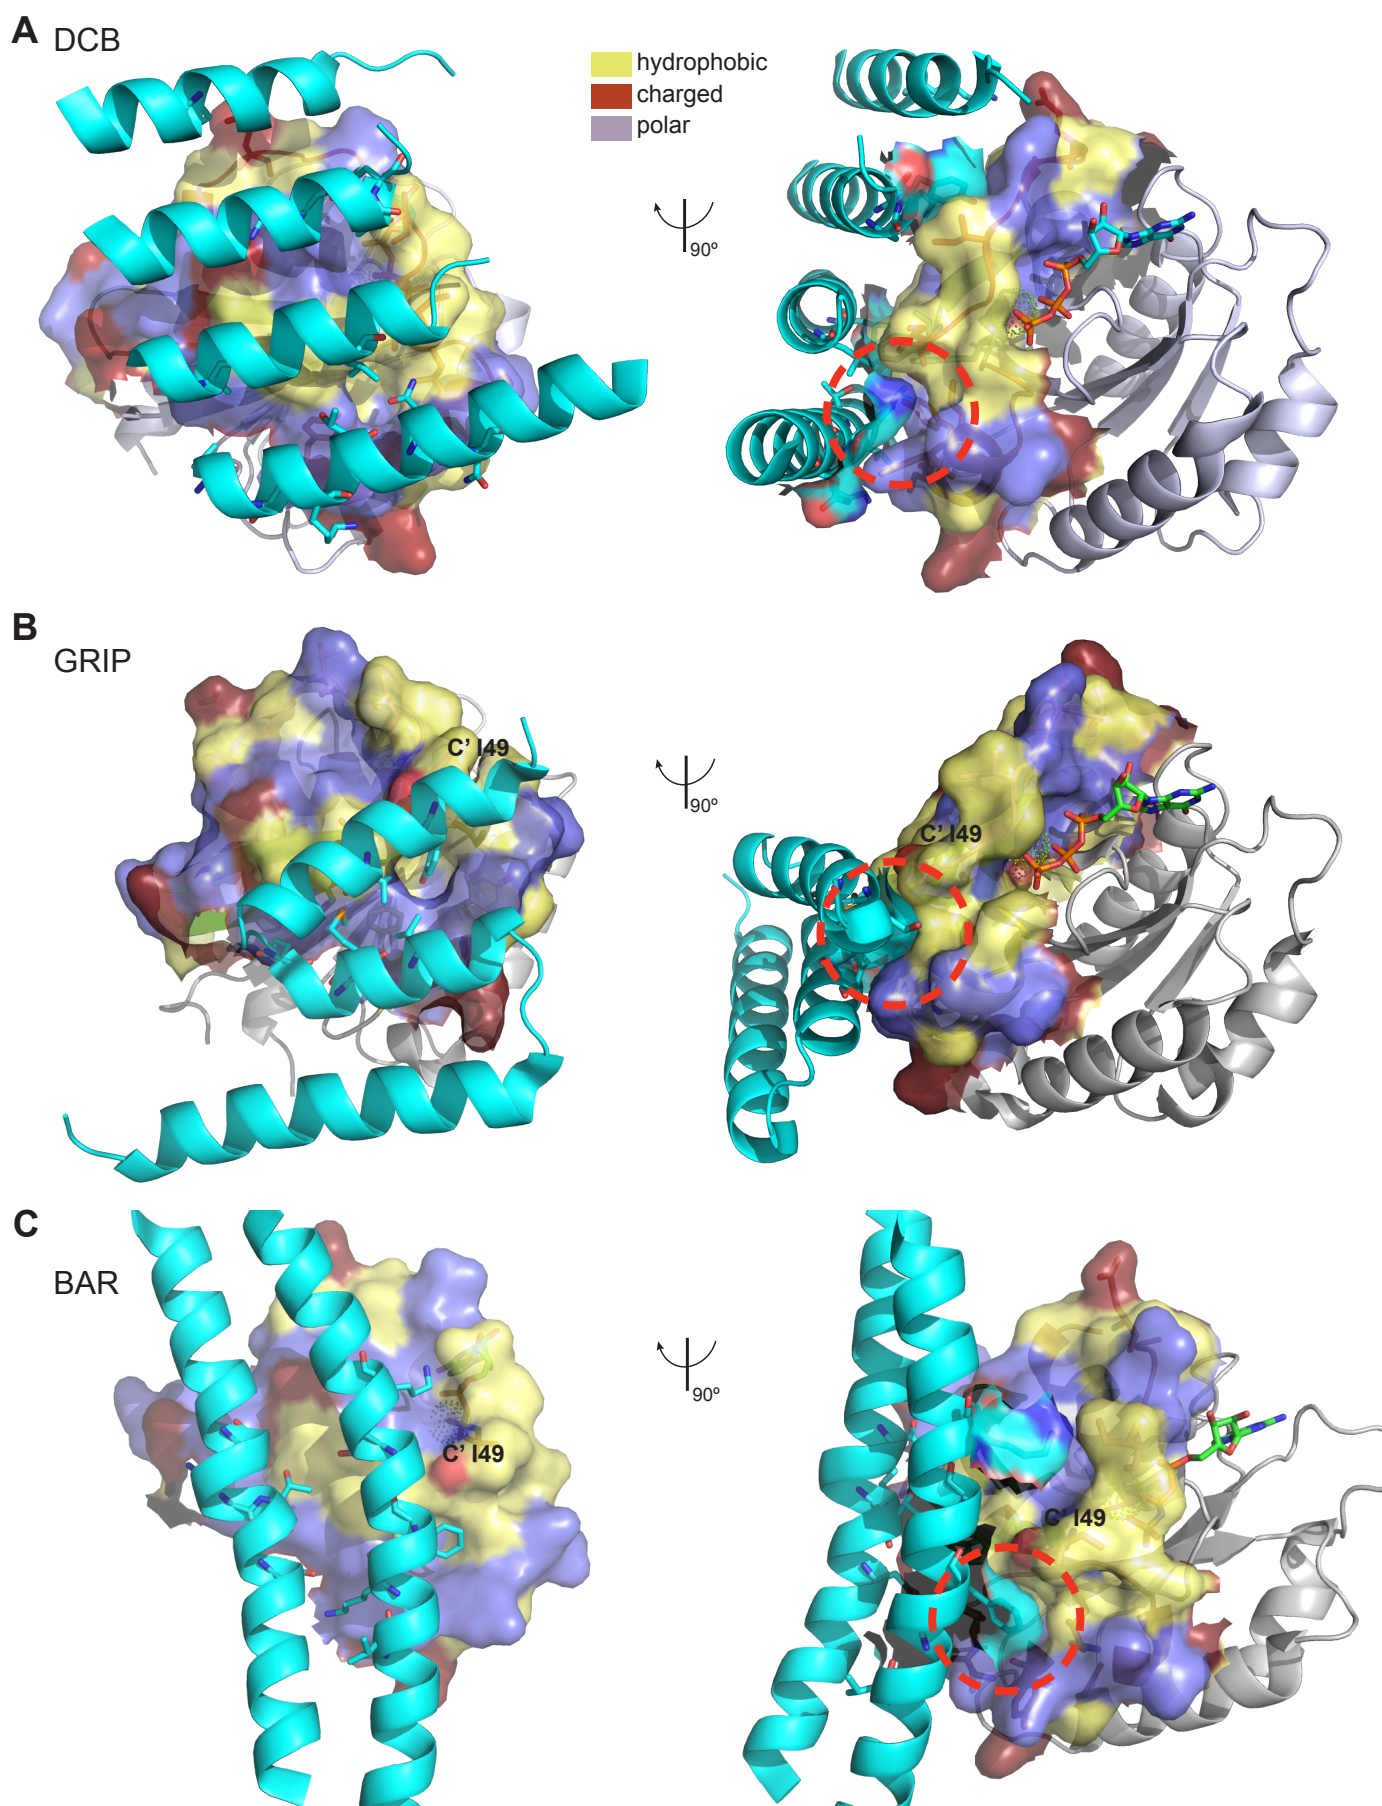

**Figure S1. Mapping of the region of BIG1 that binds to Arl1, Related to Figure 1.**

(A) Arl1 from GTP $\gamma$ S-containing cell lysates binds to the DCB domain from BIG1 and BIG2. HeLa cell lysates were supplemented with 10 mM EDTA and 0.2 mM GTP $\gamma$ S or GDP and incubated at 30°C for 20 minutes. After addition of 60 mM MgCl<sub>2</sub> the lysates were incubated at 4°C with glutathione-Sepharose beads coated with GST-DCB<sup>BIG1</sup> or GST-DCB<sup>BIG2</sup>. Bound material was eluted with 2 M NaCl and immuno-blotted for Arl1.

(B) Coomassie-stained gels of GST-Arl1<sup>GTP</sup>/BIG1<sup>N-terminal</sup> complexes purified by affinity chromatography and, where indicated, TEV cleavage and gel filtration. A fragment comprising residues 1-228 bound to Arl1<sup>GTP</sup>, as did a C-terminal truncation to residue 213, but not to residue 193. N-terminal truncations to residues 12 or 28 could still bind, but removal of the first 51 or 61 residues prevented binding. Removal of a disordered loop between residues 51 and 71 (inclusive) from the 1-228 fragment did not prevent the formation of the complex.

**Figure S2. The human Arl1<sup>GTP</sup>/DCB<sup>Δ51-71</sup> complex in stereo, Related to Figure 3.**

(A) Stereo views of a ribbon diagram of the Arl1<sup>Q71L-GTP</sup>/Mg<sup>+2</sup>/DCB<sup>Δ51-71</sup> complex. Views are rotated 90° degrees with respect to each other. The DCB<sup>Δ51-71</sup> domain is colored in green. Arl1 is shown in blue, with switch 1 colored red, interswitch in pale green and switch 2 in orange.

The GTP molecule is shown as sticks with the Mg<sup>2+</sup> ion as a sphere of green dots.

(B) Stereo view of a representative portion of the  $2F_o-F_c$  electron density map (contoured at  $2.0 \sigma$ ). The map is centered on the Arl1<sup>GTP</sup>-DCB<sup>BIG1</sup> interface. The modeled structure is shown as sticks and colored as in (A). Also labeled are the residues DCB<sup>BIG1</sup> Gln200 and Arl1 Ile49 and Tyr77.



**Figure S3. Conserved Arl1 binding surface on the BIG1 DCB domain, Related to Figure 3.**

(A) Surface representation of the BIG1 DCB domain colored according to evolutionary conservation. A UniProt search with 35% identity threshold produced 167 sequences as unique BIG1 orthologs, and these were used for ConSurf analysis. The Arl1 interaction surface is indicated in the inset images of the complex with Arl1<sup>GTP</sup> shown as ribbons.

(B) Alignment of the N-terminal region of all five proteins from humans that have a DCB domain: BIG1, BIG2, BIG3, MON2 and GBF1. Conserved residues are colored according to BLOSSUM62 with a 15% conservation threshold for visibility. Conserved residues specific to the BIG family (red dot above) or the GBF family (blue dot below) are indicated along with key residues in the Arl1<sup>GTP</sup>/DCB<sup>BIG1</sup> interface (red bold) and the DCB-DCB interface (black bold), and the secondary structure of the DCB<sup>BIG1</sup> domain.

(C) Sequence alignment of Arl1 orthologs, created as in (B). Switch 1 (red), interswitch (green,  $\beta$ -sheets depicted as arrows), switch 2 (orange), and key residues in the Arl1<sup>GTP</sup>/DCB<sup>BIG1</sup> interface (arrowheads) are indicated.

**Figure S4. Characterization of DCB<sup>BIG1</sup> mutants, Related to Figure 4.**

(A) Analysis of the thermal stability of DCB<sup>BIG1</sup> mutants. The fraction of unfolded protein was determined using circular dichroism (CD). CD melting data were transformed using the fitted baselines from spectral data.

(B) Binding analysis of DCB<sup>BIG1</sup> mutants. Ni-NTA beads loaded with His<sub>6</sub>-DCB<sup>BIG1</sup> variants were mixed with GST-Arl1<sup>ΔN14-GTP</sup>. Bound material was analyzed by SDS-PAGE and Coomassie staining.

(C) Determination of the dissociation constant of the Arl1<sup>GTP</sup>/DCB<sup>BIG1</sup> complex by fluorescence anisotropy. Arl1<sup>GTP</sup> was labeled with NT-495 and mixed with wild type DCB<sup>BIG1</sup> or the indicated double mutants. Fitting to a 1:1 binding model is shown by a solid curve.

(D) Immunoblots from transiently transfected HeLa cells expressing wild-type or mutant versions of the HA-BIG1<sup>1-559</sup> construct, and probed for the HA epitope tag or for actin as a loading control.

**Figure S5. Binding surfaces in Arl1-effector complexes, Related to Figure 6.**

(A) Two views of the Arl1<sup>GTP</sup>/DCB<sup>Δ51-71</sup> complex.  $\alpha$ -helices 1, 4, 6, 8 from the DCB domain are depicted as ribbon diagrams. The key residues involved in the interaction are shown as sticks. The Arl1 switch region is shown as a surface representation with hydrophobic residues in yellow, polar residues in purple and charged residues in brown. GTP is shown in sticks and the Mg<sup>2+</sup> ion as a sphere of green dots.

(B) Two views of the Arl1<sup>GTP</sup>/GRIP<sup>Golgin245</sup> complex with the GRIP domain as a ribbon diagram, coloring as in (A).

(C) Two views of the Arl1<sup>GTP</sup>/BAR<sup>Arfaptin2</sup> complex colored as in (A).

The Ile49 carbonyl group (C' I49) is highlighted in red in the three complexes, and the hydrophobic pocket is indicated with a red dashed circle.

Table S1 Data Collection and Refinement Statistics, Related to Figure 3

|                      |                 | DCB <sup>Δ51-71</sup> -Arl1 <sup>GTP</sup>              |
|----------------------|-----------------|---------------------------------------------------------|
| Data collection      |                 |                                                         |
| Space group          |                 | C121                                                    |
| Unit cell dimensions |                 | a=84.17 Å, b=50.73 Å, c=103.8 Å<br>α=90°, β=112°, γ=90° |
| Resolution (Å)       |                 | 29.05-2.28                                              |
| Rmerge               |                 | 0.048 (0.667)                                           |
| I/σ                  |                 | 12.4 (1.7)                                              |
| Completeness (%)     |                 | 97.3 (94.1)                                             |
| Redundancy           |                 | 3.2 (3.2)                                               |
| Refinement           |                 |                                                         |
| Resolution (Å)       |                 | 29.0-2.28                                               |
| No. of reflections   |                 | 35386                                                   |
| Rwork/Rfree          |                 | 0.2589/0.2170                                           |
| No. of atoms         |                 | 3008                                                    |
|                      | Protein         | 2895                                                    |
|                      | Ligand/ion      | 73                                                      |
|                      | Water           | 40                                                      |
| <i>B</i> -factors    |                 |                                                         |
|                      | Protein         | 67.6                                                    |
|                      | Ligand/ion      | 63.7                                                    |
|                      | Water           | 59.6                                                    |
| Rms deviation        |                 |                                                         |
|                      | Bond length (Å) | 0.01                                                    |
|                      | Bond angles (°) | 1.158                                                   |
| PDB ID               |                 | 5EE5                                                    |

Values in parentheses are for highest-resolution shell
