# Supplementary material for: Structural Insights into Arl1-Mediated Targeting of the Arf-GEF BIG1 to the trans-Golgi
Source: PubMed Central journal article supplement (PMC4956616; doi:10.1016/j.celrep.2016.06.022), 2016-06-30
Supplement: mmc2.pdf [file mmc2.pdf]

# Cell Reports

## Structural Insights into Arl1-Mediated Targeting of the Arf-GEF BIG1 to the *trans*-Golgi

### Graphical Abstract

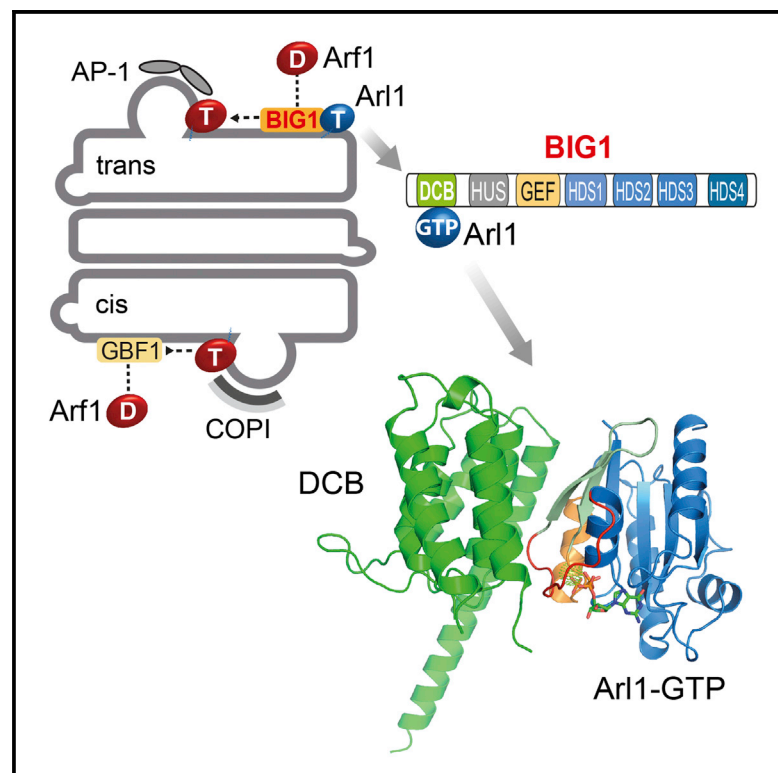

### Authors

Antonio Galindo, Nicolas Soler, Stephen H. McLaughlin, Minmin Yu, Roger L. Williams, Sean Munro

### Correspondence

sean@mrc-lmb.cam.ac.uk

### In Brief

The GTPase Arf1 is essential for Golgi function and is activated on the *trans*-Golgi by the BIG1 exchange factor. A second GTPase, Arl1, is required for BIG1 recruitment. Galindo et al. find that Arl1 binds to the DCB domain of BIG1 and determine the structure of human Arl1 bound to this domain.

### Highlights

- Arl1 binds the N-terminal DCB domain of the Arf1-GEF BIG1
- Structure of the human DCB<sup>BIG1</sup>/Arl1 complex is solved at 2.3 Å resolution
- The Arl1 binding surface on the DCB domain is unrelated to known Arl1 effectors
- Structure-guided mutation shows BIG1 needs Arl1 binding for Golgi targeting

### Accession Numbers

5EE5

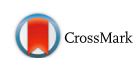

# Structural Insights into Arl1-Mediated Targeting of the Arf-GEF BIG1 to the *trans*-Golgi

Antonio Galindo,<sup>1</sup> Nicolas Soler,<sup>1</sup> Stephen H. McLaughlin,<sup>1</sup> Minmin Yu,<sup>1</sup> Roger L. Williams,<sup>1</sup> and Sean Munro<sup>1,\*</sup>

<sup>1</sup>MRC Laboratory of Molecular Biology, Francis Crick Avenue, Cambridge CB2 0QH, UK

\*Correspondence: [sean@mrc-lmb.cam.ac.uk](mailto:sean@mrc-lmb.cam.ac.uk)  
<http://dx.doi.org/10.1016/j.celrep.2016.06.022>

## SUMMARY

The GTPase Arf1 is the major regulator of vesicle traffic at both the *cis*- and *trans*-Golgi. Arf1 is activated at the *cis*-Golgi by the guanine nucleotide exchange factor (GEF) GBF1 and at the *trans*-Golgi by the related GEF BIG1 or its paralog, BIG2. The *trans*-Golgi-specific targeting of BIG1 and BIG2 depends on the Arf-like GTPase Arl1. We find that Arl1 binds to the dimerization and cyclophilin binding (DCB) domain in BIG1 and report a crystal structure of human Arl1 bound to this domain. Residues in the DCB domain that bind Arl1 are required for BIG1 to locate to the Golgi *in vivo*. DCB domain-binding residues in Arl1 have a distinct conformation from those in known Arl1-effector complexes, and this plasticity allows Arl1 to interact with different effectors of unrelated structure. The findings provide structural insight into how Arf1 GEFs, and hence active Arf1, achieve their correct subcellular distribution.

## INTRODUCTION

Membrane trafficking depends on the Arf and Rab small GTPase families (Donaldson and Jackson, 2011; Gillingham and Munro, 2007; Hutagalung and Novick, 2011). In the active (GTP-bound) state, each GTPase binds a specific set of effectors that typically includes vesicle coats, motor proteins, and vesicle tethering factors, as well as diverse regulators of organelle function. Each active GTPase is typically present on only one organelle, and so collectively, they determine the subcellular distribution of numerous proteins. Thus, understanding how GTPases are only activated in a particular location is critical to understanding the logic of sub-cellular organization. For many GTPases, it has been possible to identify specific guanine nucleotide exchange factor (GEFs) that catalyze replacement of bound GDP with GTP and so generate the active form of the GTPase. The organelle-specific targeting of these GEFs is likely to be a major factor in determining the distribution of active GTPases, but it remains poorly understood for most Rabs and Arfs, especially as almost all GEFs are themselves peripheral membrane proteins and hence will require specific interactions with GTPases and other

molecules for accurate membrane targeting (Barr, 2013; Mizuno-Yamasaki et al., 2012).

Of the small GTPases that regulate membrane traffic, Arf1 has emerged as a master regulator of Golgi function (Jackson and Bouvet, 2014; Pasqualato et al., 2002). In its GTP-bound state, Arf1, and its close relatives, Arf3, Arf4, and Arf5, recruit the COPI coat to the *cis*-Golgi to generate vesicles for transport within the stack and back to the ER, while on the *trans*-Golgi, Arf1 recruits the clathrin adaptor proteins AP-1 and AP-3 to make vesicles directed to endosomes (Cherfils, 2014; Paczkowski et al., 2015). Inhibition of Arf activity by drugs or mutation causes disassembly of the Golgi apparatus and a complete block in trafficking pathways (Klausner et al., 1992; Sáenz et al., 2009).

Arl1 activation on the Golgi is mediated by two distinct families of GEFs, with mammals having GBF1 on the *cis*-Golgi, and two closely related paralogs, BIG1 and BIG2, on the *trans*-Golgi (Togawa et al., 1999; Zhao et al., 2002). Although these large soluble proteins are related over much of their ~1,800-residue length, both GBF1 and BIG1/2 have clear orthologs in all eukaryotic kingdoms and so are thought to have diverged before the appearance of the last eukaryotic common ancestor, indicating that they have fundamentally distinct roles (Bui et al., 2009; Wright et al., 2014).

Both GBF1 and BIG1/2 contain a central Sec7 domain that catalyzes nucleotide exchange on Arf1 (Cherfils et al., 1998; Mossessova et al., 1998). However, it remains unclear how the proteins are targeted to different regions of the Golgi stack. In addition to the ~250-residue Sec7 domain, the GBF1 and BIG1 proteins share five homology domains that are well conserved in evolution (Bui et al., 2009; Mouratou et al., 2005). Recent studies have suggested that other small GTPases bind to these domains outside of the Sec7 domain to modulate the location and extent of Arf1 activation. In particular, *Drosophila* Arf-like GTPase Arl1 binds to the N-terminal region of the fly ortholog of BIG1, and in mammalian cells, Arl1 is required for the targeting of BIG1 to the Golgi (Christis and Munro, 2012). In addition, the yeast BIG1 ortholog Sec7 binds to Arl1, and also to Arf1 itself and two Rab family proteins Ypt1 and Ypt31, and these interactions have been proposed to be involved in the Golgi recruitment and activation of Sec7 (McDonald and Fromme, 2014; Richardson et al., 2012). The interaction with Arl1 is likely to be a key determinant of the *trans*-Golgi localization of BIG1, as Arl1 specifically localizes to the *trans*-Golgi in both yeast and mammalian cells (Lu et al., 2001). Moreover, Arl1 mediates Golgi recruitment of several coil-coiled proteins

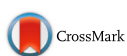

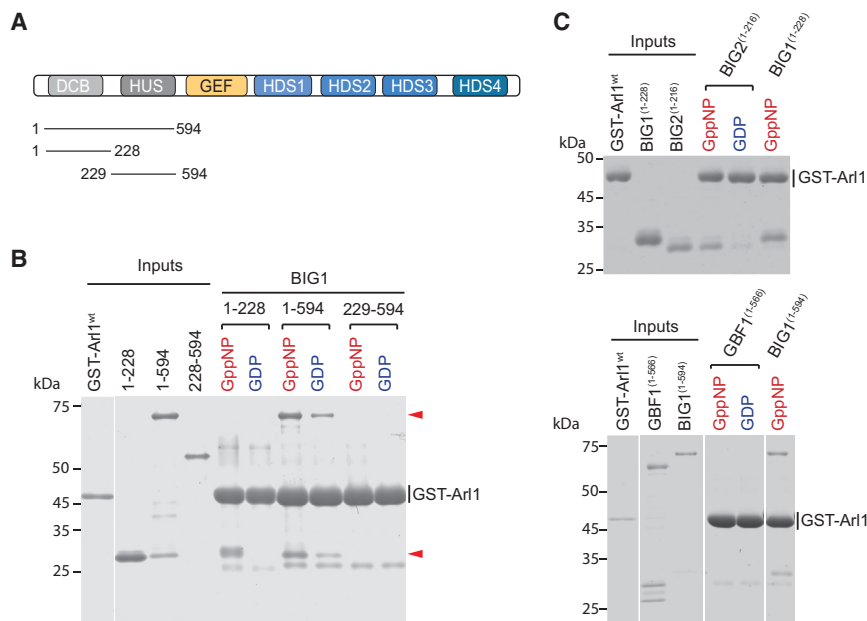

**Figure 1. BIG1 Binds to Arl1 via the DCB Domain**

(A) Domain structure of the BIG family of Arf-GEFs: DCB (dimerization and cyclophilin binding), HUS (homology upstream of Sec7), and HDS (homology downstream of Sec7).

(B) Coomassie-blue stained protein gel of binding assays between His<sub>6</sub>-tagged BIG1 fragments and GST-Arl1<sup>ΔN14</sup>. Input lanes contain 10% of the material used for pull-downs. Fragments containing the DCB<sup>BIG1</sup> domain bound preferentially to GST-Arl1<sup>ΔN14</sup> loaded with the GTP-analog GMP-PNP (red arrows).

(C) Pull-downs assay similar to (B) but with a BIG2 N-terminal fragment (1–216) or with a GBF1 N-terminal fragment (1–566).

See also Figure S1.

that tether incoming vesicles, suggesting that Arl1 could be a master regulator of *trans*-Golgi membrane traffic (Panic et al., 2003b; Wong and Munro, 2014).

Arl1 binds to the N-terminal 559 residues of BIG1, a region that is sufficient for Golgi targeting and that contains two predicted domains: the DCB (dimerization and cyclophilin binding) and the HUS (homology upstream of Sec7) domains (Bui et al., 2009; Mouratou et al., 2005; Christis and Munro, 2012; Mansour et al., 1999). The association of a missense mutation in the BIG2 DCB domain with a case of a familial neurodevelopmental disorder (Sheen et al., 2004) and the fact that DCB in GBF1 is needed for picornavirus replication (Belov et al., 2010) underscore the importance of the DCB domain.

To gain insight into how Arl1 regulates Arf1 activation at the *trans*-Golgi, we have mapped the Arl1 binding site on BIG1 to the N-terminal DCB domain and then determined its structure in a complex with Arl1<sup>GTP</sup> at a resolution of 2.3 Å. Mutagenesis shows that interaction between the DCB domain and Arl1 is a major determinant of BIG1's ability to recognize the *trans*-Golgi. The Arl1 binding surface on the DCB domain consists of four parallel  $\alpha$  helices, a structure unrelated to any known Arl1 effectors, and the Arl1 residues in the binding interface show a conformational plasticity that allows it to specifically recognize structurally unrelated effectors.

## RESULTS

### Identification of the DCB Domain as the Arl1 Binding Site

The N-terminal part of the *Drosophila* BIG1 homolog Sec71 binds directly to GTP-bound Arl1, and the analogous region of human BIG1 (1–559) is sufficient for Golgi targeting in mammalian cells (Christis and Munro, 2012; Mansour et al., 1999). This region contains two of the six conserved domains of the proteins, the DCB and HUS domains (Figure 1A). To map the Arl1 binding

region, N-terminal fragments of BIG1 were assayed for binding to human GST-Arl1. The DCB domain (DCB<sup>BIG1</sup> [1–228]) bound to Arl1<sup>GTP</sup>, while the HUS domain did not, with a similar result obtained with the *Drosophila* proteins (Figure 1B; data not shown). The DCB domain could also capture endogenous Arl1 from mammalian cell lysates in a GTP-dependent manner (Figure S1A).

The DCB domain was first described in GNOM, an *Arabidopsis* ortholog of GBF1 (Grebe et al., 2000). Related DCB domains in mammalian GBF1 and BIG1 were found based on sequence conservation between different species (Bui et al., 2009; Mouratou et al., 2005). The DCB domain in human BIG1 was originally annotated as residues 70–228; however, we found that while the N terminus could be truncated to residue 23 and still interact with Arl1<sup>GTP</sup>, larger N-terminal truncations to 51 or 61 did not bind, indicating that the actual domain is slightly larger (Figure S1B). Arl1<sup>GTP</sup> shows specificity for DCB domains from proteins of the BIG family, as it also binds to the related region from BIG2, but not to the equivalent part of human GBF1 (Figure 1C).

### Crystallization of a Complex of Arl1<sup>GTP</sup> Bound to the DCB Domain

To elucidate the nature of the DCB domain and the basis of its interaction with Arl1, the first 228 residues of human BIG1 (DCB<sup>BIG1</sup>) was coexpressed in *Escherichia coli* with human Arl1 lacking residues 1–14. These residues form an amphipathic helix that becomes fully exposed upon GTP binding, and its removal has been found to be necessary for the crystallization of GTP-bound forms of Arf-family proteins (Panic et al., 2003a; Shiba et al., 2003; Wu et al., 2004). As in previous studies, the mutation Q71L was used to ensure that the protein remained in the GTP-bound form.

This initial complex crystallized in space group P312, with unit cell dimensions  $a, b = 96.5$  Å and  $c = 201.1$  Å, but the collected data were not of sufficient quality to solve the structure. Inspection of alignments of BIG1 orthologs from diverse species revealed a region between residues 51 and 71 that is poorly conserved and predicted to be disordered (Figure 2, highlighted

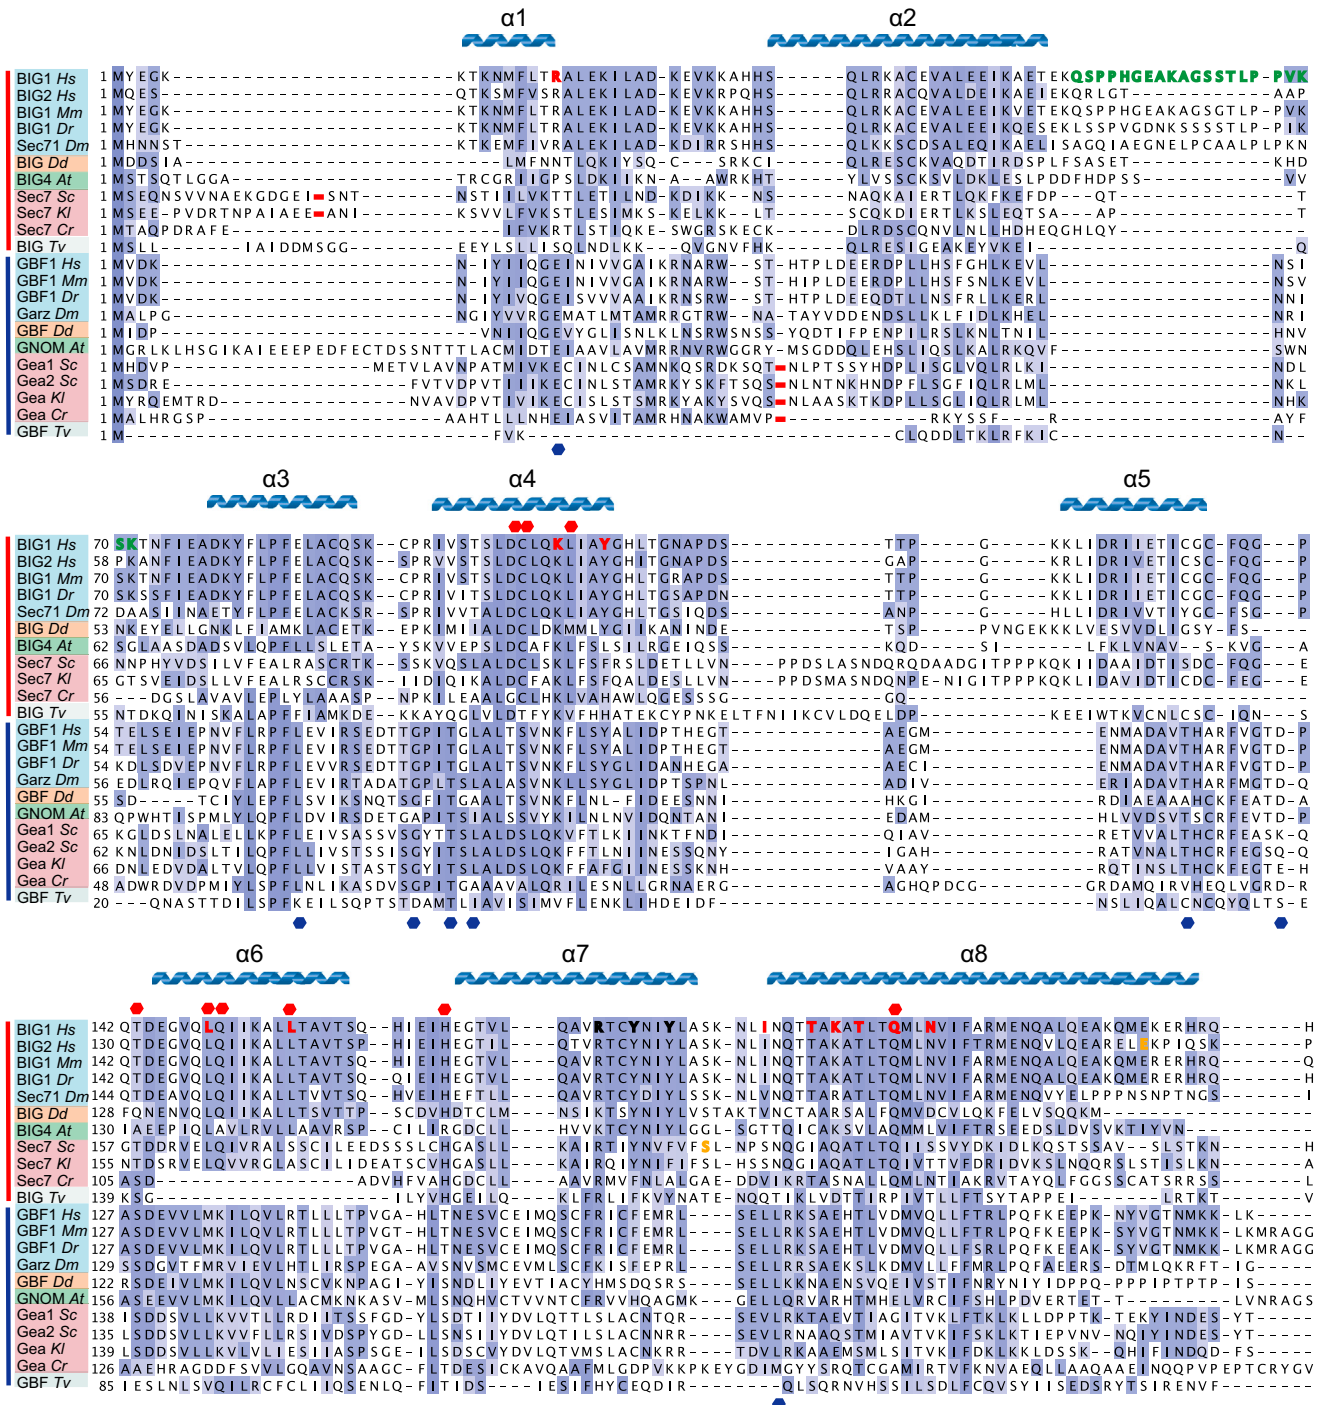

**Figure 2. Alignment of the N-Terminal Region of the BIG and GBF Families of Arf-GEFs**  
 Alignment of sequences of BIGs and GBFs from diverse species (Hs, *Homo sapiens*; Mm, *Mus musculus*; Dr, *Danio rerio*; Dm, *Drosophila melanogaster*; Dd, *Dictyostelium discoideum*; At, *Arabidopsis thaliana*; Sc, *Saccharomyces cerevisiae*; Kl, *Kluyveromyces lactis*; Cr, *Chlamydomonas reinhardtii*; Tv, *Trichomonas vaginalis*). Metazoan names are blue; plants, protists, and fungi are green, orange, and gray, respectively. Conserved residues are colored according to the BLOSSUM62 matrix (threshold for visibility is 10%). Deletions (red dashes) correspond to Ser18-Gly217 in *S. cerevisiae* Sec7, Arg17-Met82 in *K. lactis* Sec7, Thr39-Asn65 in Gea1, Ser36-Asn62 in Gea2, Ser40-Asn66 in *K. lactis* Gea, and Pro36-Arg51 in *C. reinhardtii* Gea. Also indicated are conserved residues specific to the BIG family (red dot above) or to the GBF family (blue dot below). Residues 51–71 (inclusive) in human BIG1 deleted for crystallization are green. Key residues in the Ar1<sup>GTP</sup>/DCB<sup>BIG1</sup> interaction (red bold) and the DCB-DCB interface (black bold) are shown along with the secondary structure of the DCB<sup>BIG1</sup> domain. Orange bold type indicates Ser402 in *S. cerevisiae* Sec7, mutation of which to Leu results in a temperature-sensitive phenotype (Jones et al., 1999), and Glu209 in human BIG2, mutation of which to Lys causes paraventricular heterotopia (Sheen et al., 2004).



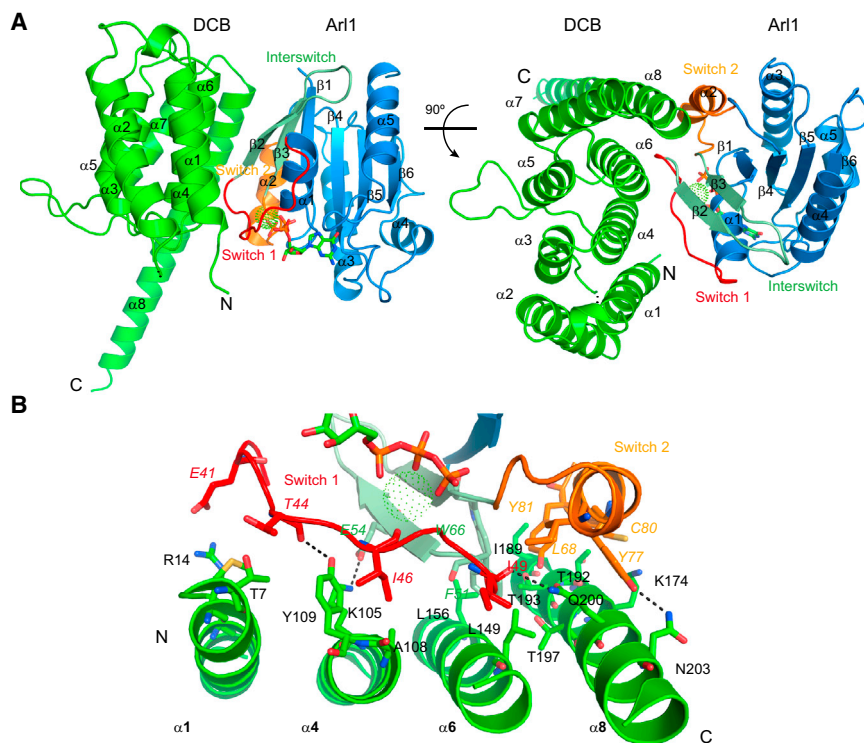

**Figure 3. Structure of the Human Arl1<sup>GTP</sup> / DCB<sup>Δ51-71</sup> Complex**

(A) Two views of the Arl1<sup>Q71L-GTP</sup>/Mg<sup>2+</sup>/DCB<sup>Δ51-71</sup> complex. The DCB<sup>Δ51-71</sup> domain (green) is formed by eight  $\alpha$  helices and binds Arl1 via helices 1, 4, 6, and 8. Arl1 is blue, with switch 1 in red, the interswitch in pale green, and switch 2 in orange. The GTP molecule is shown as sticks, and Mg<sup>2+</sup> as a sphere of green dots.

(B) The Arl1-DCB domain interface. DCB  $\alpha$ 1 and  $\alpha$ 4 abut switch 1 and the interswitch of Arl1, while  $\alpha$ 6 and  $\alpha$ 8 abut the interswitch and switch 2. Side chains of residues involved in the interaction are shown as sticks. The DCB domain residues are green with black labels. The Arl1 switch 1, interswitch, and switch 2 residues are colored as in (A). Residue contacts based on hydrogen bonds with atomic distance below 3Å are indicated with black dashed lines.

See also Figures S2 and S3 and Table S1.

in green). Deletion of this putative unstructured loop did not affect the interaction between Arl1<sup>GTP</sup> and DCB<sup>BIG1</sup> domain (Figure S1) but improved the quality of the crystals.

This modified complex Arl1<sup>Q71L-GTP</sup>/DCB<sup>Δ51-71</sup> crystallized in space group C2, with unit cell dimensions  $a = 84.2$  Å,  $b = 50.7$  Å, and  $c = 103.8$  Å, with one complex per asymmetric unit. The X-ray structure was determined at 2.3 Å resolution (Table S1) and solved by molecular replacement using Arl1 from the Arl1<sup>GTP</sup>:GRIP domain complex and the N-terminal HEAT (Huntingtin, elongation factor 3, protein phosphatase 2A, and TOR1)-like repeat domain of the *Drosophila melanogaster* microtubule regulatory protein MAST/Orbit that was predicted to be distantly related to the DCB domain by HHpred (De la Mora-Rey et al., 2013; Hildebrand et al., 2009; Panic et al., 2003a). The final model includes all of the residues of the DCB<sup>Δ51-71</sup> domain with the exception of three residues (71–73) adjacent to the region that was deleted (Figures 3A and S2).

### Overall Structure of Arl1<sup>Q71L-GTP</sup>/DCB<sup>Δ51-71</sup> Domain Complex

The DCB domain is comprised of eight antiparallel  $\alpha$  helices arranged a twisted array where helices 1, 4, and 6 are packed against helices 2, 3, 5, and 7. Helices 3–8 form a right-handed helical solenoid similar to a HEAT repeat domain (Figure 3A). The beginning of  $\alpha$  helix 8 is also facing helix 7, but its C-terminal half protrudes out of the rest of structure. The arrangement of the helices creates two different surfaces. One formed by helices 1, 4, 6, and 8 is slightly convex and interacts with Arl1<sup>Q71L-GTP</sup>, and the other formed by helices 2, 3, 5, and

7 is slightly concave. The region removed to aid crystallization (51–71) connects helices 2 and 3, and the remaining link between these two  $\alpha$  helices is not fully ordered in our model (residues 72 and 73). As expected, the Arl1<sup>Q71L-GTP</sup> exhibits the typical fold of small GTPases, containing a six-stranded  $\beta$  sheet surrounded by five  $\alpha$  helices (Hanzal-Bayer et al., 2002).

### The Interaction Interface between Arl1 and the DCB Domain

The interface between Arl1<sup>GTP</sup> and DCB<sup>Δ51-71</sup> has a total surface area of 1,509 Å<sup>2</sup>. Arl1<sup>GTP</sup> engages with the DCB domain mainly through switch 1 and switch 2, with some additional residues from the interswitch. This accounts for the GTP-dependency of binding as these regions of Arf family G proteins undergo large conformational changes upon GTP-binding (Pasqualato et al., 2002). DCB domain  $\alpha$  helices 1 and 4 form most of the switch 1 interactions and  $\alpha$  helices 6 and 8 interact mainly with switch 2 (Figure 3B).

The surface on Arl1<sup>GTP</sup> that interacts with the DCB domain is composed mainly of hydrophobic amino acids (Glu41, Thr44, Ile46, Ile49, Phe51, Glu54, Trp66, Tyr77, Cys80, and Asn84). Of these, those from switch 1 and the interswitch are present in many Arf family members with, for instance, all being conserved in Arf1 (Figure S3). However, from switch 2, Tyr77 is present in only a few other Arls, and Cys80 is unique to Arl1 (Pasqualato et al., 2002). The region of the DCB domain that interacts with Arl1<sup>GTP</sup> comprises twenty residues that are within 3.7 Å of the surface of Arl1. The closest, ie those within 3.3 Å or less, are the hydrophobic residues Ala108, Leu149, Leu156, Ile189, and the polar and charged residues Arg14, Lys105, Tyr109, Thr193, Lys195, Thr197, Gln200, and Asn203 (Figure 3B). Most of these residues are conserved in DCB domains across species (Figures S3A and S3B).

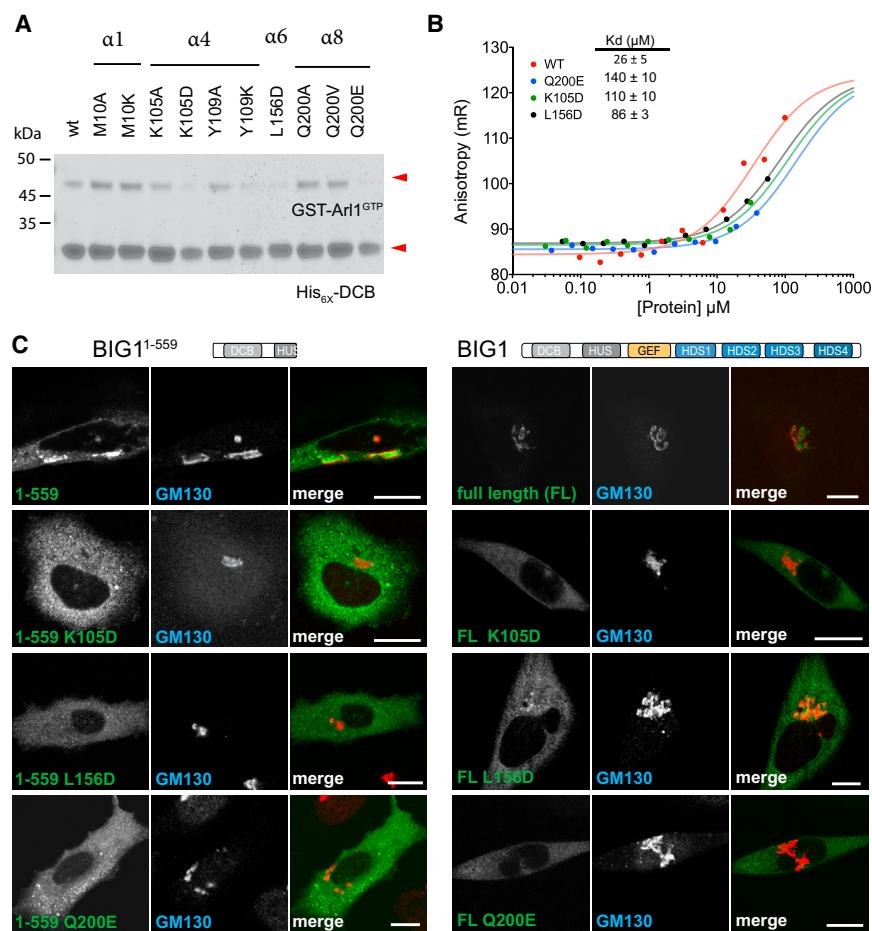

**Figure 4. Mutational Analysis of Residues in the Arl1 Binding Interface**

(A) Binding assay to determine the effect of DCB mutations on binding to Arl1. The indicated versions of His<sub>6</sub>-DCB<sup>BIG1</sup> were mixed with GMP-PNP loaded GST-Arl1<sup>ΔN14</sup>, and material bound to Ni-NTA beads was analyzed by SDS-PAGE and Coomassie staining.

(B) Determination of the dissociation constant of the Arl1<sup>GTP</sup>/DCB<sup>BIG1</sup> complex by fluorescence anisotropy. NT-495-labeled Arl1<sup>GTP</sup> was mixed with wild-type or DCB<sup>BIG1</sup> mutants. Curves fitted to a 1:1 binding model are shown, along with the calculated  $K_d$ .

(C) Confocal micrographs of HeLa cells expressing hemagglutinin (HA)-tagged forms of BIG1<sup>1-559</sup> or full-length BIG1. After fixation, cells were stained for the H-tag and the Golgi marker GM130. Scale bars, 15  $\mu\text{m}$ .

See also Figure S4.

Comparison of GBF1 and BIG1 orthologs reveals four conserved regions: the first two map to  $\alpha$  helices 1 and 2 in the DCB<sup>BIG1</sup> structure, the third one is formed by  $\alpha$  helices 3 and 4, and the last one includes the helices 6, 7 and 8. Some of these conserved residues are shared among BIG and GBF families, such as Lys105, Leu155, and Ala194 while others are specific to one of the two classes, such as Cys102, Leu156, and Gln200 in BIG1 (Figure 2). Close inspection of the structure shows that one of these BIG-specific residues, Gln200, makes extensive hydrophobic interactions with residue Tyr77 in switch 2 of Arl1, a residue that is involved in binding other Arl1 effectors, as discussed below.

### Structure-Based Mutational Analysis of Golgi Membrane Recruitment

Next, we investigated whether the residues that form the interaction surface between Arl1<sup>GTP</sup> and the DCB domain are actually important for BIG1's ability to bind to Arl1-GTP in vitro and to localize to the Golgi in vivo. Residues located in the conserved regions of DCB  $\alpha$  helices 4, 6, and 8 were found to be needed for binding in vitro. Thus, Lys105Asp or Tyr109Lys substitutions in Arl1-binding residues in  $\alpha$  helix 4 prevented copurification of recombinant DCB<sup>BIG1</sup> with Arl1<sup>GTP</sup> (Figure 4A). Similar results were obtained when Leu156 ( $\alpha$  helix 6) or Gln200 ( $\alpha$  helix 8)

Leu156Asp having a somewhat smaller effect (Figures 4B, S4B, and S4C).

We next investigated the effect of these mutations on the ability of BIG1 to bind to the Golgi in vivo. The mutations Lys105Asp, Leu156Asp, and Gln200Glu that all had a strong effect on binding in vitro also caused both full-length BIG1 and BIG1<sup>1-559</sup> to relocalize to the cytoplasm (Figure 4C). Protein blots of cell lysates confirmed that the mislocalization of the mutants is not due to protein degradation, and thus the DCB-Arl1 interaction is a major determinant of BIG1 recruitment to the Golgi (Figure S4D).

### DCB Domain Dimerization Interface

The original description of the DCB domain reported that the related region of the plant GBF1 ortholog, GNOM, could dimerize in a yeast two-hybrid assay (Grebe et al., 2000). In addition a yeast two-hybrid screen revealed cyclophilin Cyp5 as a putative interaction partner, although Cyp5 was found to have a leader peptide and subsequently shown to be in the ER lumen, making it very unlikely that the two proteins interact in vivo (Anders et al., 2008). However, the DCB domains of human BIG1 and BIG2 were also found to form dimers, as determined by both gel filtration and analytical ultracentrifugation (Ramaen et al., 2007). In the crystal two Arl1-GTP/DCB<sup>Δ51-71</sup> complexes related by two-fold crystallographic symmetry have an extensive interface

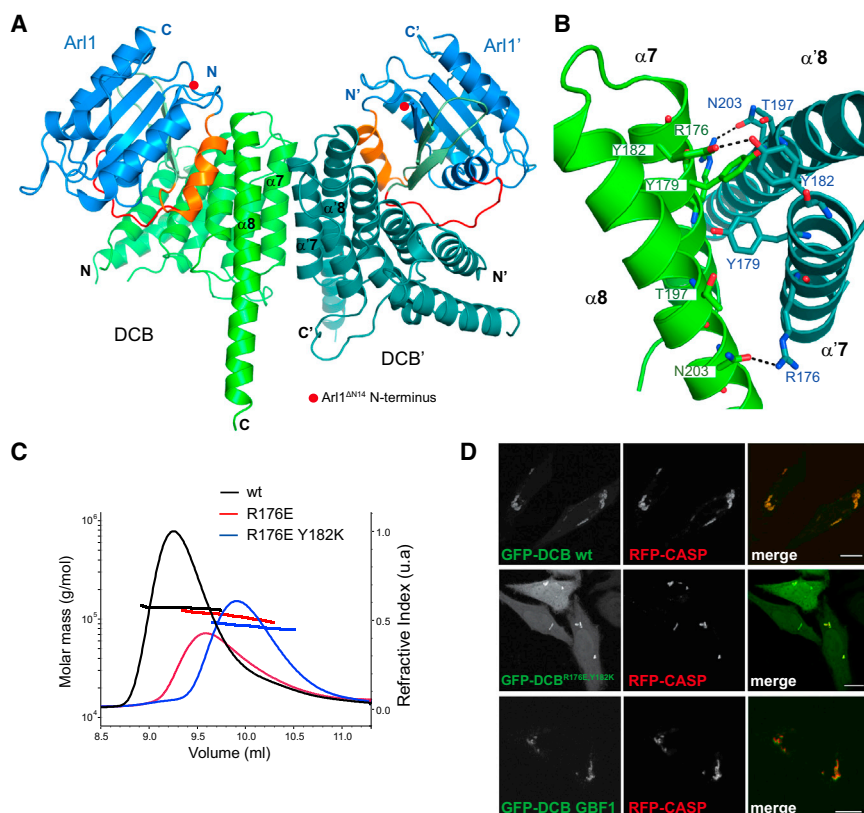

**Figure 5. The DCB<sup>BIG1</sup> Domain Dimer**

(A) Ribbon diagrams of two adjacent asymmetric units of the Arl1<sup>GTP</sup>/DCB<sup>Δ51-71</sup> complex. The two DCB domains (green and turquoise) interact through helices α7 and α8. Each DCB domain binds to a molecule of Arl1 (blue, with switch 1 in red, interswitch in pale green, and switch 2 in orange) such that the two Arl1 N termini (red dots) are the same side of the complex.

(B) DCB<sup>Δ51-71</sup> dimer interface. Residues involved in dimerization are shown as sticks and contacts based on hydrogen bonds with a distance below 3 Å (dashed lines).

(C) Determination of native molecular weight of MBP-tagged DCB<sup>BIG1</sup> proteins by SEC-MALS. The expected size for a MBP-DCB<sup>BIG1</sup> monomer is 69 kDa, while the average mass for the wild-type protein is 129 kDa, R176E mutant is 110 kDa, R176E/Y182K is 83 kDa.

(D) Confocal micrographs of live HeLa cells expressing the N-terminal GFP-tagged DCB domains from BIG1 or GBF1 as indicated. An RFP-tagged form of the golgin CASP was used as a Golgi marker (Gillingham et al., 2002). The R176E/Y182K mutant is expressed at slightly higher levels than the wild-type protein for reasons that are unclear. It is still targeted to the Golgi, and at comparable expression levels, the mutant appeared indistinguishable from wild-type, but we show representative cells where the expression levels, and hence cytoplasmic staining, are higher. Scale bars, 5 μm.

(866.9 Å<sup>2</sup>) and suggest a dimer of heterodimers (Figure 5A). The dimerization interface comprises helices α7 and α8 that are rich in hydrophobic and basic residues. The hydroxyl group of Tyr182 is hydrogen bonded to the hydroxyl group of Tyr182 in the adjacent symmetric chain, while Arg176 is hydrogen bonded to Asn203 in the symmetric molecule (Figure 5B). The arrangement of the Arl1 proteins in the dimer would allow their N-terminal amphipathic helices to interact simultaneously with the lipid bilayer, an arrangement also seen in the two other Arl1 effectors whose structures have been solved (Nakamura et al., 2012; Panic et al., 2003a; Wu et al., 2004). However, although mutation of Arg176 and Tyr182 disrupted dimerization of the isolated domain in solution, this did not affect Golgi targeting in vivo, and so the physiological significance of this dimer is unclear (Figures 5C and 5D). Interestingly, a recent study of human GBF1 reported that mutations that disrupt dimerization in vitro had no effect on localization or activity (Bhatt et al., 2016). It may be that if the dimer exists in vivo it represents an inactive or non-membrane-bound form of the GEF.

#### Interaction between Arl1 and DCB Differs from Other Arl1 Effectors

We next compared the structure of this complex to those of the two known complexes involving other Arl1 effectors. These are the GRIP (golgin-97, RanBP2α, Imh1p, and p230/golgin-245) domain from the C terminus of golgin-245, one of several GRIP-domain-containing coiled-coil proteins that can capture endosome-derived vesicles, and Arfaptin-2, a BAR (Bin-Amphi-

physin-Rvs) domain protein that is localized to the *trans*-Golgi but whose function is unclear (Man et al., 2011; Nakamura et al., 2012; Panic et al., 2003a). The three effectors are completely unrelated in structure, but all three bind Arl1 via the hydrophobic interaction surface formed by the switch regions (Figures 6A and 6B). The GRIP<sup>Golgin245</sup> domain interacts mainly with Arl1 switch 2 and the hydrophobic pocket (Figures 6C and S5), but there is another hydrophobic groove formed by switch 1 and the interswitch that makes extensive contacts with the DCB<sup>BIG1</sup> and the BAR<sup>Arfaptin2</sup> domains (Figures 6A, 6D, and S5). Few residues outside the switch regions in Arl1 contribute to the interactions, apart from Asn84, which interacts with Ile188 in DCB<sup>BIG1</sup>; and Arg19, which interacts with Ile189 in DCB<sup>BIG1</sup> and with Asp220 in the α2 chain of Arfaptin-2 (Nakamura et al., 2012). The major role of the switch regions in the interactions accounts for the specificity of all three effectors for the GTP-bound form of Arl1.

Khan and Ménétrey have proposed a classification scheme to highlight properties shared by domains that bind to Arf/Rab GTPases (Khan and Ménétrey, 2013). Many of these domains adopt an “all-α-helical” conformation ranging from coiled-coil structures to α-helical bundles or aspects of both. These domains usually interact with the GTPase via two helices that pack against the switch-interswitch junction. In the case of the DCB domain, the surface of interaction is actually formed by four parallel helices, two of which interact with Arl1’s switch 2 with the other two interacting mainly with switch 1.



The ability of Arl1 to recognize three very different effectors raises the question of how it can maintain selectivity for its own effectors over those of related GTPases while at the same time being promiscuous in the interactions formed by its effector-binding interface. Selectivity can be explained by the sequences of the switch regions themselves, and in particular switch 2, which is involved in effector binding in all three complexes and has residues conserved in few, if any, other members of the Arf family.

As for the structural plasticity that underlies the binding of several distinct effectors by the same GTPase, examination of other Arf:effector complexes revealed that Arf proteins generally maintain a rigid core structure independent of their binding partners (Khan and Ménétrey, 2013). Thus, the major site of conformational variability is the interaction interface itself. At the center of the interaction surface is a common hydrophobic area (CHA) of  $\sim 480$  Å (Figure 6B) (Khan and Ménétrey, 2013; O'Neal et al., 2005). A feature of the CHA is the aromatic triad Phe51, Trp66, and Tyr81 that is highly conserved in Arfs and Rabs and found in some cases to undergo rotational isomerization to allow binding to different effectors (Khan and Ménétrey, 2013; Recacha et al., 2009). However, this does not appear to be the case for Arl1, as these three residues vary little among the three complexes.

The other conserved feature of the CHA is the hydrophobic pocket located at the interface between switch 1, the inter-switch, and switch 2, and in Arl1 comprising nine residues: Ile49 and Gly50 from switch 1; Phe51, Val53, and Trp66 from the inter-switch; and Ile74, Tyr77, and Tyr81 from switch 2 (Figure 6B). Comparison of the three structures reveals that the largest differences in the interfacial side chains are in the residues in switch 1 that flank the hydrophobic pocket (Figure 6C). In the case of the GRIP domain, Tyr2177 projects into the hydrophobic pocket to hydrogen bond with Tyr81 from Arl1 (Figure 6D). Likewise, the Arfaptin-2 BAR domain also projects Phe285 inside the hydrophobic pocket. In both cases, the carbonyl group of Arl1 Ile49 is facing out of the hydrophobic pocket (Figure 6D). In contrast, in the Arl1<sup>GTP</sup>/DCB<sup>A51-71</sup> complex, the carbonyl group of Arl1 Ile49 remains buried inside the rim of the hydrophobic pocket (Figure 6D). The switch between these two conformations is possible because of the adjacent Gly50 residue. For the DCB interaction, the Arl1 hydrophobic pocket is locked by Gln200 from the DCB domain, which does not protrude deeply into the pocket, but its amide group is hydrogen bonded to the oxygen from the carbonyl of Ile49, and the phenyl group of Tyr77 is rotated by 70° (relative to that in the GRIP domain complex) so as to face the side chain of Gln200 (Figure 6D). Previous studies on the GTPase Arl2 have also found two distinct orientations for the carbonyl before Gly50 in complexes with two different effectors (Chavier and Ménétrey, 2010; Hanzal-Bayer et al., 2002; Zhang et al., 2009). Indeed, this glycine residue is conserved in all Arf family members except Sar1 and in the Rab and Ran families as well, suggesting that it is key contributor to the structural plasticity that allows these GTPases to bind to multiple effectors.

## DISCUSSION

Our work has provided structural insight into the regions that flank the central Sec7 catalytic domain of the two major classes

of Golgi Arf GEF. In addition, it shows how Arl1 interacts with BIG1 via the DCB domain. Although some of the conserved residues in the BIG1 DCB domain are specific to the BIG family, this DCB region is also present in the GBF1 family and in the more distantly related MON2 and BIG3 proteins that lack GEF activity and are of unknown function (Efe et al., 2005; Gillingham et al., 2006; Li et al., 2014). Thus, it seems possible that the DCB domain of these other proteins will also contribute to membrane recruitment by binding other small GTPases. Indeed, we found that the DCB domain of human GBF1 is sufficient for Golgi targeting (Figure 5D). This DCB domain does not bind Arl1, consistent with GBF1 being on the *cis*-Golgi (Figure 1C). The first 380 residues of GBF1 that include the DCB domain have been reported to interact with Rab1B (Monetta et al., 2007), but we were not able to detect an interaction between GBF1 fragments DCB<sup>(1-215)</sup> or DCB-HUS<sup>(1-566)</sup> and either Rab1A or Rab1B (A.G., unpublished data).

Another notable feature of the DCB domain is that it has a HEAT repeat structure. Strikingly, the structural-based homology detection program HHpred (Hildebrand et al., 2009) not only detects that DCB is related to known HEAT repeat proteins but also predicts a similar relationship for large sections of the rest of the regions of BIG1 and GBF1 that flank the Sec7 domain. Thus, it seems quite possible that these proteins are elongated molecules consisting of the Sec7 domain flanked by HEAT-repeat-based solenoids that serve as flexible scaffolds for interaction with membrane landmarks and regulatory molecules (Andrade et al., 2001). Given this likely elongated structure for these large proteins, it seems improbable that Arl1 is the only protein that interacts with BIG1 (Wright et al., 2014). Indeed, studies on yeast Sec7 have shown an interaction not only with Arl1 but also with Arf1, Ypt1, and Ypt31 (McDonold and Fromme, 2014). The DCB domain of yeast Sec7 also appears important for Golgi targeting, as the yeast *sec7-1* allele, a thermosensitive mutant that carries the substitution S402L in the DCB domain (Figure 2), results in mislocalization of GFP-Sec7-1 at the restrictive temperature (Richardson et al., 2012). Sec7's interaction with Arf1 may provide a positive feedback loop to increase recruitment, but it seems unlikely to have a role in specificity as Arf1-GTP is also abundant on the *cis*-Golgi. The interactions with Ypt1 and in particular Ypt31 appear to activate exchange activity by relieving inhibitory interactions following membrane binding (McDonold and Fromme, 2014). The relevance of these findings to mammalian cells is unclear, and indeed, in mammals, the orthologs of Ypt1 (Rab1) and Ypt31 (Rab11) are on the *cis*-Golgi and recycling endosomes, respectively. Nonetheless, although our results demonstrate that, in mammals, Arl1 is critical for bringing BIG1 to the Golgi, the rest of BIG1 could help to stabilize membrane binding, regulate GEF activity, or even scaffold interactions with other proteins once BIG1 is membrane associated.

In addition to the findings described here, a recent paper has reported the structure of an N-terminal region of Sec7 from the thermophilic filamentous fungus *Thielavia terrestris* that contains both the DCB and adjacent HUS domain (Richardson et al., 2016). The overall fold of the DCB domain is the same as that we find for human BIG1, and the HUS domain is confirmed to comprise a HEAT-repeat solenoid as predicted by HHPRED



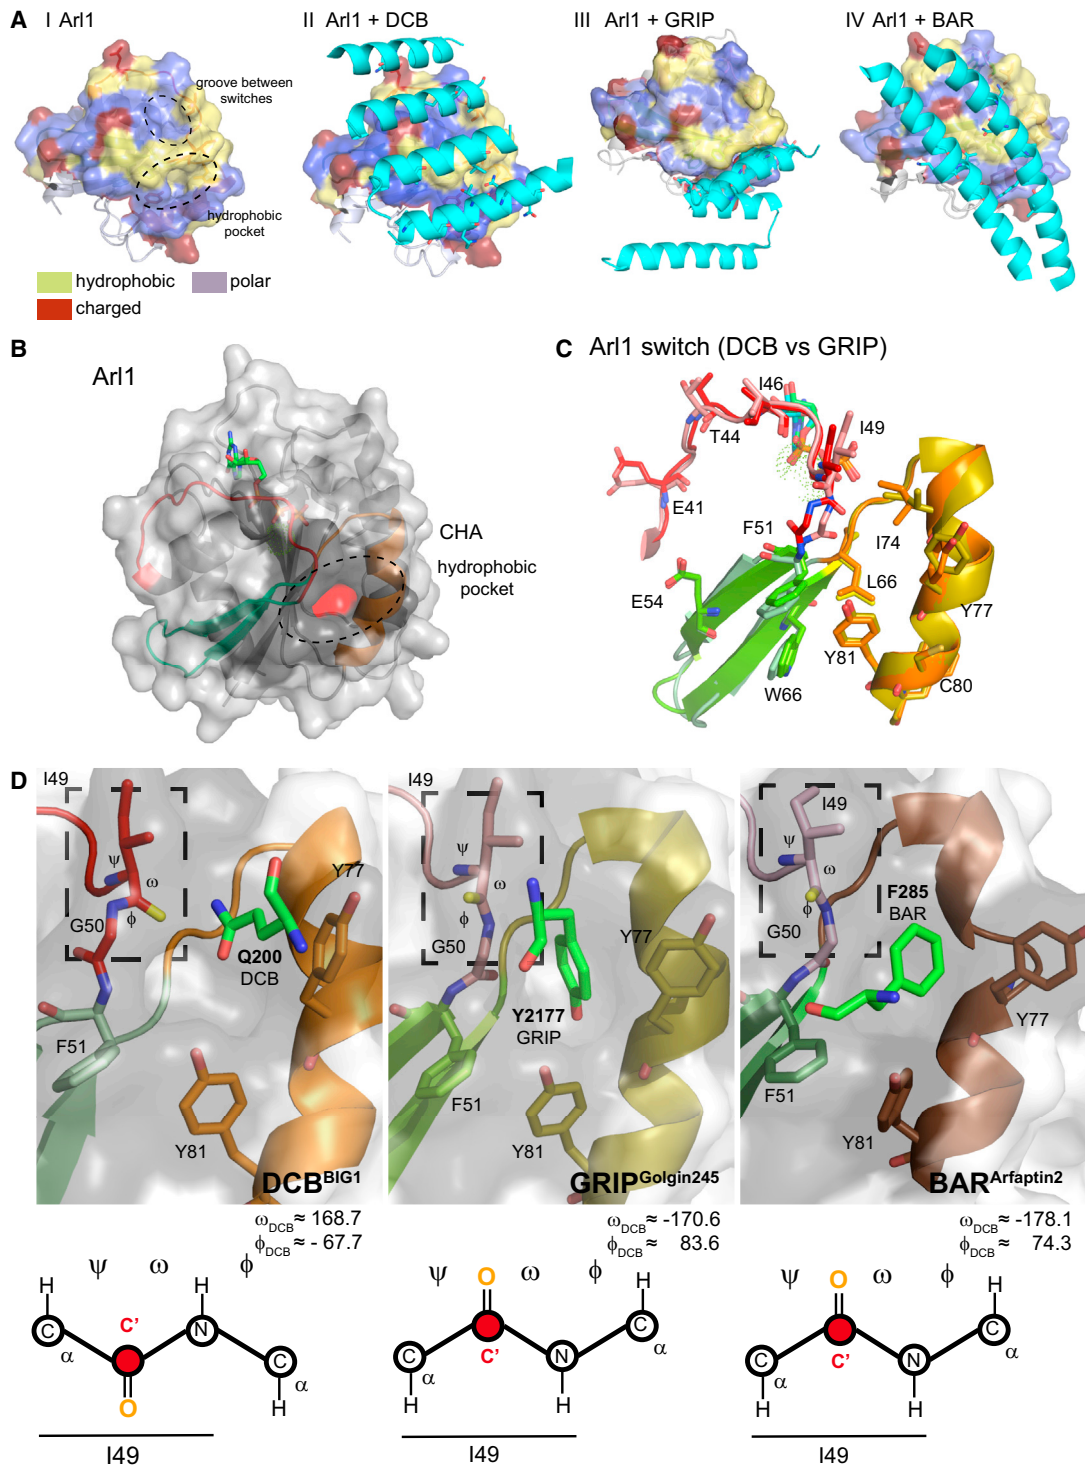

**Figure 6. Comparison of Arl1 Effector Complexes**

(A) From left to right: surface representation of Arl1<sup>GTP</sup> from the Arl1<sup>GTP</sup>/DCB<sup>Δ51-71</sup> structure (I). Hydrophobic residues are yellow, polar residues purple, and charged residues brown. Ellipses indicate the hydrophobic pocket and the groove between switch 1 and switch 2. Ribbon diagram of  $\alpha$  helices 1, 4, 6, and 8 of DCB<sup>Δ51-71</sup> domain bound to Arl1<sup>GTP</sup> colored as in I (II). Side chains involved in the interaction are shown as sticks. Ribbon diagram of the entire GRIP domain from golgin-245 bound to the Arl1<sup>GTP</sup> colored as in I (PDB: 1UPT) (III). Ribbon diagram of  $\alpha$  helices 2 and 3 from BAR<sup>Arfaptin2</sup> bound to the Arl1<sup>GTP</sup> colored as in (A) (PDB: 4DCN) (IV).

(legend continued on next page)

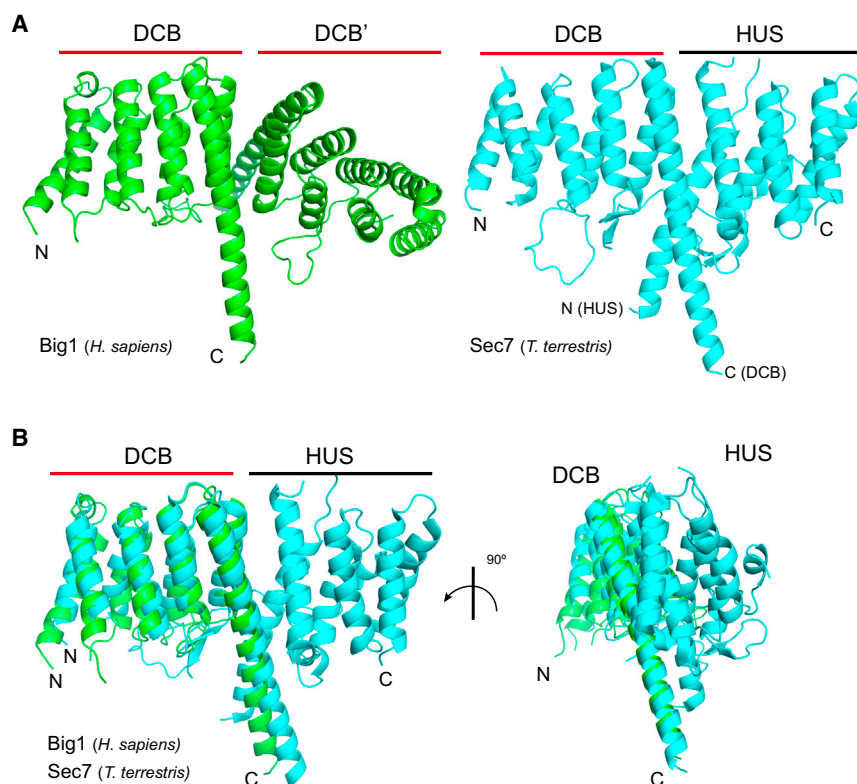

**Figure 7. Comparison between the Structures of DCB<sup>Δ51-71</sup> BIG1 and DCB-HUS Sec7**  
(A) Ribbon diagrams of the DCB<sup>Δ51-71</sup>/DCB<sup>Δ51-71</sup> dimer from human BIG1 (green) and the structure of the DCB-HUS region from *Thielavia terrestris* Sec7 (blue, PDB: ID 5HAS).

(B) Two views of an alignment of human BIG1 DCB<sup>Δ51-71</sup> and the DCB domain from the DCB-HUS *T. terrestris* Sec7 structure, with coloring as in (A). The root-mean-square deviation is 8.4 Å, with this relatively high value primarily reflecting differences in the conformation of the loop between  $\alpha$  helices 4 and 5 and in the tilt of  $\alpha$  helix 8.

two helices that, unlike the rest, project out of the solenoid. Moreover, in most species, these helices are connected by a linker of  $\sim$ 100 residues that is poorly conserved and predicted to be disordered. This raises the possibility that under some circumstances, the DCB and HUS domains separate to allow the DCB domain to form a homodimeric interaction or to even pair with the HUS domain on a second molecule as has been suggested previously (Ramaen et al., 2007). Indeed, although the *T. terrestris* DCB-HUS fragment that was crystallized is monomeric

(Figures 7A and 7B). Two interesting features emerge from comparing the two studies. First, although Sec7 from the budding yeast *Saccharomyces cerevisiae* is reported to bind Arl1, the DCB-HUS region of the protein does not appear to bind Arl1 (Richardson et al., 2016). However, although the 20 residues that form the Arl1 interface in human BIG1 are very well conserved in metazoans (eg 18 are identical in *Drosophila* with two conservative changes), they are not well conserved in yeast (only six are identical in *S. cerevisiae* Sec7). Thus, it appears that in yeasts Arl1 binds to a region of the protein other than the DCB domain recognized in metazoans. The second interesting feature revealed by comparing the structures is that in the DCB-HUS structure, the HUS domain covers the region on the DCB domain that forms the DCB homo-dimer interface reported here (Figure 7B). This raises the possibility that the ability of the isolated DCB domain to form a dimer in vitro could simply be a consequence of removing the HUS domain. However, it is striking that the junction between the DCB and HUS domains involves

in solution, the equivalent region of *S. cerevisiae* Sec7 is dimeric (Richardson et al., 2016).

A full understanding of the organization of these Arf GEFs and how this relates to their activity will probably require the structure of a complete protein. Nonetheless, our structural and mutagenesis data show that Arl1 is a major determinant for recruiting BIG1 to the *trans*-Golgi, and they identify the DCB domain as a small GTPase binding region for at least the mammalian large Arf GEFs. These data thus open the way to a structurally informed dissection of the targeting and regulation of these key components of membrane traffic.

## EXPERIMENTAL PROCEDURES

### Protein Expression and Purification

Human Arl1 (UniProt P40616, residues 15–181), carrying the Q71L mutation, and human BIG1 (UniProt Q9Y6D6) fragment DCB<sup>BIG1</sup> (residues 1–228) were co-expressed from pOPTC (Panic et al., 2003a) in BL21-(DE3)-RIPL as GST-Arl1<sup>Q71L</sup> and His<sub>6</sub>-DCB<sup>BIG1</sup>. The same strategy was followed for the

(B) Arl1<sup>GTP</sup> ribbon diagram/surface representation. Switch 1 is red, interswitch is pale green, and switch 2 is orange. The dark gray part of the surface indicates the common hydrophobic area (CHA), with the hydrophobic pocket in red. The GTP molecule is shown as sticks.

(C) Alignment of the Arl1 switch regions from the Arl1<sup>GTP</sup>/DCB<sup>Δ51-71</sup> and Arl1<sup>GTP</sup>/GRIP<sup>Golgin245</sup> complexes based on C $\alpha$  position (root-mean-square deviation of 0.538 Å). Switch 1 is red or pink, the interswitch celadon or grass green, and switch 2 orange or yellow for the Arl1<sup>GTP</sup>/DCB<sup>BIG1</sup> and Arl1<sup>GTP</sup>/GRIP<sup>Golgin245</sup> structures, respectively. Key residues of the CHA are indicated.

(D) The Arl1 hydrophobic pocket in the DCB<sup>BIG1</sup>, GRIP<sup>Golgin245</sup>, and BAR<sup>Arfaptin2</sup> complexes. Arl1 residues I49, G50, F51, Y77, and Y81 are shown as sticks. Also shown is a single residue from each of the three different Arl1 effectors that projects into the pocket (bright green). Values of dihedral angles for Ile49 are indicated (rectangle). Angles are similar in the three structures, but their orientation in the DCB structure is reversed, resulting in a different position of the I49 carbonyl (C') group, as indicated below each view.

See also Figures S5.

coexpression of Arl1<sup>Q71L</sup> and the BIG1 fragment DCB<sup>Δ51-71</sup> (residues 1–228 with a deletion of 21 residues [51–71 inclusive]). Cells expressing either Arl1<sup>Q71L</sup>/DCB<sup>BIG1</sup> or Arl1<sup>Q71L</sup>/DCB<sup>Δ51-71</sup> were grown at 37°C until optical density 600 (OD<sub>600</sub>) ~1 and induced with 0.2 mM IPTG at 15°C for 16 hr. Cells were pelleted, resuspended in buffer A (50 mM Tris-HCl [pH 7.5], 100 mM NaCl, 5 mM MgCl<sub>2</sub>, 1 mM DTT, and 0.2 mM GTP) and lysed with an Emulsiflex-C3 at 15,000 psi at 4°C. The cell lysate was cleared by centrifugation at 16,000 × g for 30 min at 4°C and mixed with glutathione-Sepharose beads (GE Healthcare). After three washes of ten bed volumes, resin-bound material was released with 0.08 mg TEV protease per 10 mg complex for 12 hr at 4°C. The Arl1<sup>Q71L</sup>/DCB complexes were further purified by gel filtration on a Superdex 75 16/60 column equilibrated in buffer B (20 mM Tris-HCl [pH 7.5], 100 mM NaCl, 1 mM MgCl<sub>2</sub>, 1 mM DTT, and 0.01 mM GTP). After elution, fractions were concentrated to 12–14 mg/ml and snap frozen in liquid nitrogen.

### Crystallization

Initial crystals of Arl1<sup>Q71L</sup>/DCB<sup>BIG1</sup> and Arl1<sup>Q71L</sup>/DCB<sup>Δ51-71</sup> complexes were obtained by vapor diffusion in sitting drop at 18°C. Drops were made by mixing 50 nl protein solution and 50 nl reservoir solution (Arl1<sup>Q71L</sup>/DCB<sup>BIG1</sup>: 17%–22% [w/v] PEG4000, 100 mM Tris-HCl 8.5, 150 mM Li<sub>2</sub>SO<sub>4</sub>; Arl1<sup>Q71L</sup>/DCB<sup>Δ51-71</sup>: 10% [w/v] PEG8000/PEG1000, 100 mM Tris-OAc [pH 8.5], and 0.1–0.2 mM NaOAc). Microseeding was used to increase crystal nucleation. Crystals were harvested and cryo-cooled in reservoir solution supplemented with 25% (w/v) PEG4000 for Arl1<sup>Q71L</sup>/DCB<sup>BIG1</sup> or with 20% (v/v) glycerol in the case of Arl1<sup>Q71L</sup>/DCB<sup>Δ51-71</sup>.

### Data Collection, Phasing, and Model Refinement

Diffraction data were collected at –100°C at beamlines I03 and I04 at the Diamond Light Source (STFC-UK). Crystallographic data were processed with XDS (Kabsch, 2010) or iMOSFLM (Powell et al., 2013) and reduced and scaled using Pointless and Aimless from the CCP4 suite (Winn et al., 2011). Crystal structures were solved by molecular replacement using Phaser (McCoy et al., 2007). Search models were Arl1<sup>Q71L-GTP</sup> (PDB: 1UPT) (Panic et al., 2003a) and the N-terminal region of MAST/Orbit (PDB: 4G3A) (De la Mora-Rey et al., 2013). Model rebuilding was done with Coot (Emsley et al., 2010) and PHENIX (Adams et al., 2010). Final statistics for the 2.3-Å resolution model are given in Table S1. The accession number for the coordinates and structure-factor amplitudes of Arl1<sup>GTP</sup>/DCB<sup>Δ51-71</sup> is PDB: 5EE5. Identification of key residues involved in Arl1<sup>GTP</sup>/DCB<sup>BIG1</sup> interaction and DCB<sup>BIG1</sup>/DCB<sup>BIG1</sup> were based on results obtained from NCONT and CONTACT from CCP4 (Winn et al., 2011). Figures were produced using PyMOL 1.7 and surface conservation assessed with ConSurf (Landau et al., 2005).

### Fluorescence Anisotropy Experiments

The binding of DCB variants to Arl1, labeled with NT-495 (NanoTemper Technologies), was measured by fluorescence anisotropy at 20°C using a PHERAstar plate-reader (BMG Labtech). The reaction was followed in 50 mM Tris-HCl (pH 8.0), 110 mM KCl, 1 mM DTT, 5 mM MgCl<sub>2</sub>, 0.001% (v/v) Triton X-100, 0.1% (v/v) Tween-20, and 5 μM GTP. A control reaction with free NT-495 label showed no change in anisotropy with increasing protein concentration. Using a single-site binding model, the data were fitted to the equation:

$$F = F_0 + \frac{(F_1 - F_0) \{ ([PT] + [LT] + K_d) - \sqrt{([PT] + [LT] + K_d)^2 - 4[PT][LT]} \}}{2[PT]}$$

where  $F_0$  and  $F_1$  are the anisotropy in the absence of titrating protein and at saturation respectively,  $[LT]$  and  $[PT]$  are the total concentrations of DCB<sup>BIG1</sup> and labeled Arl1<sup>GTP</sup>, and  $K_d$  is the dissociation constant. For all the mutant DCB proteins, except K105A/Q201V, Q200E, and L156D, the value of  $F_1$  was fixed at the value fitted for the wild-type.

### Circular Dichroism

Circular dichroism (CD) scans were recorded between 190 and 260 nm using a JASCO-815 CD spectrophotometer at a protein concentration of 8 μM in PBS at 20°C. Control spectra of buffer were used to subtract the baseline contribution to the signals. Thermal denaturations were performed over the range of

4°C to 95°C at a rate of 1°C/min. Data were fitted to a Boltzmann curve with sloping baselines:

$$Y_{obs} = (Y_{0N} + \alpha NT) + \frac{(Y_{0D} + \beta DT) - (Y_{0N} + \alpha NT)}{1 + \exp\left\{\frac{(T_m - T)}{C}\right\}}$$

where  $Y_{obs}$  is the observed CD signal at temperature  $T$ ;  $Y_N$  and  $Y_D$  are the native and denatured protein CD contributions with  $\alpha_N$  and  $\beta_D$  are the slopes for the native and denatured signals, respectively;  $T_m$  is the melting temperature; and  $C$  is a constant. To compare protein stability of DCB<sup>BIG1</sup> variants, CD thermal denaturation data were transformed using the fitted baselines to the CD scans data, and they were plotted as fraction of unfolded protein ( $f_u$ ) versus temperature:

$$f_u = \frac{Y_{obs} - (Y_{0N} + \alpha NT)}{(Y_{0D} + \beta DT) - (Y_{0N} + \alpha NT)}$$

### SEC-MALS Analysis

MBP-tagged DCB<sup>BIG1</sup> proteins were resolved on a Superdex-75 HR10/300 analytical gel filtration column (GE Healthcare) at 0.5 ml/min in PBS (pH 7.5), 150 mM NaCl, 5 mM MgCl<sub>2</sub>, and 0.001% (w/v) Triton X-100 before detection on a Wyatt Helelos II 18 angle light-scattering instrument coupled to a Wyatt Optilab rEX online refractive index detector and determination of native molecular weight (Perica et al., 2014).

### Binding Assays

GST-Arl1 (residues 15–181) and His<sub>6</sub>-tagged N-terminal fragments of human BIG1, BIG2 (UniProt Q9Y6D5) and GBF1 (UniProt Q92538) were expressed in BL21-CodonPlus (DE3)-RIPL cells and lysates prepared as described above. His<sub>6</sub>-tagged proteins were purified using Ni-NTA beads (QIAGEN) and GST-Arl1 using glutathione-Sepharose (GE Healthcare). Purified protein were eluted and desalted in buffer C (20 mM Tris-HCl, 110 mM KCl, 0.1 mM Mg<sub>2</sub>Cl, 1 mM DTT, and 0.1% Triton X-100). Purified GST-Arl1 was loaded with nucleotide by incubation at 37°C for 30 min in 10 mM EDTA and either 200 μM GMP-PNP or 1 mM GDP and then by increasing the MgCl<sub>2</sub> to 20 mM and cooling to 4°C. 2 nM GST-Arl1<sup>GMP-PNP</sup> or GST-Arl1<sup>GDP</sup> was mixed with 2 nM of the His<sub>6</sub>-tagged protein in 500 μl buffer C plus 5 mM MgCl<sub>2</sub> and rotated at 4°C for 30 min before adding 10 μl 50% glutathione-Sepharose beads. Beads were washed thrice with 1 ml buffer C plus 5 mM MgCl<sub>2</sub> and bound material eluted with SDS buffer and analyzed by SDS-PAGE. 10 μl Ni-NTA beads preloaded with His<sub>6</sub>-tagged DCB<sup>BIG1</sup> variants was mixed with 1 nM GST-Arl1<sup>GMP-PNP</sup> in 500 μl buffer C plus 5 mM MgCl<sub>2</sub> and 40 mM imidazole. Beads were washed thrice with 1 ml supplemented buffer C and bound material eluted with 20 μl of SDS buffer and analyzed by SDS-PAGE.

### Microscopic Imaging

HeLa Cells were transfected using FuGene 6 (Promega) and plated onto multispot microscope slides 12 hr after transfection. Cell fixation, permeabilization, staining, and confocal imaging (Zeiss LSM 780) were performed as described previously (Wong and Munro, 2014). Live cell images were acquired at 37°C using a stage incubator and four-well chambers (Nunc Lab-Tek) in media supplemented with fetal bovine serum and 20 mM HEPES (pH 7.2).

### ACCESSION NUMBERS

The accession number for the *H. sapiens* Arl1<sup>Q71L</sup>/DCB<sup>Δ51-71</sup> complex reported in this paper is PDB: 5EE5.

### SUPPLEMENTAL INFORMATION

Supplemental Information includes Supplemental Experimental Procedures, five figures, and one table and can be found with this article online at <http://dx.doi.org/10.1016/j.celrep.2016.06.022>.



## AUTHOR CONTRIBUTIONS

A.G. conceived and performed experiments and wrote the manuscript, S.M. conceived the study and experiments and wrote the manuscript, N.S. did the phasing and model refinement, M.Y. contributed to data acquisition, and S.H.M. and R.L.W. provided expertise and feedback.

## ACKNOWLEDGMENTS

We thank Alison Gillingham for comments on the manuscript, Olga Perisic for technical advice, and Susana Goncalves for help with data collection at ESRF beamline ID23-1. We thank Keith Henderson, Mark Williams, Pierpaolo Romano, Ralf Flaig, and Marco Mazzorana for help with Diamond Light Source beamlines I03, I04, and I04-1. This research was funded by the UK Medical Research Council (MRC file reference numbers MC\_U105178783 [to S.M.] and MC\_U105184308 [to R.L.W.]), and an EMBO Long-Term Fellowship (to A.G.).

Received: December 16, 2015

Revised: May 9, 2016

Accepted: June 2, 2016

Published: June 30, 2016

## REFERENCES

- Adams, P.D., Afonine, P.V., Bunkóczi, G., Chen, V.B., Davis, I.W., Echols, N., Headd, J.J., Hung, L.W., Kapral, G.J., Grosse-Kunstleve, R.W., et al. (2010). PHENIX: a comprehensive Python-based system for macromolecular structure solution. *Acta Crystallogr. D Biol. Crystallogr.* **66**, 213–221.
- Anders, N., Nielsen, M., Keicher, J., Stierhof, Y.D., Furutani, M., Tasaka, M., Skriver, K., and Jürgens, G. (2008). Membrane association of the *Arabidopsis* ARF exchange factor GNOM involves interaction of conserved domains. *Plant Cell* **20**, 142–151.
- Andrade, M.A., Petosa, C., O'Donoghue, S.I., Müller, C.W., and Bork, P. (2001). Comparison of ARM and HEAT protein repeats. *J. Mol. Biol.* **309**, 1–18.
- Barr, F.A. (2013). Review series: Rab GTPases and membrane identity: causal or inconsequential? *J. Cell Biol.* **202**, 191–199.
- Belov, G.A., Kovtunovych, G., Jackson, C.L., and Ehrenfeld, E. (2010). Poliovirus replication requires the N-terminus but not the catalytic Sec7 domain of ArfGEF GBF1. *Cell. Microbiol.* **12**, 1463–1479.
- Bhatt, J.M., Viktorova, E.G., Busby, T., Wyzozumska, P., Newman, L.E., Lin, H., Lee, E., Wright, J., Belov, G.A., Kahn, R.A., and Sztul, E. (2016). Oligomerization of the Sec7 domain Arf guanine nucleotide exchange factor GBF1 is dispensable for Golgi localization and function but regulates degradation. *Am. J. Physiol. Cell Physiol.* **310**, C456–C469.
- Bui, Q.T., Golinelli-Cohen, M.P., and Jackson, C.L. (2009). Large Arf1 guanine nucleotide exchange factors: evolution, domain structure, and roles in membrane trafficking and human disease. *Mol. Genet. Genomics* **282**, 329–350.
- Chavrier, P., and Ménétreay, J. (2010). Toward a structural understanding of arf family: effector specificity. *Structure* **18**, 1552–1558.
- Cherfils, J. (2014). Arf GTPases and their effectors: assembling multivalent membrane-binding platforms. *Curr. Opin. Struct. Biol.* **29**, 67–76.
- Cherfils, J., Ménétreay, J., Mathieu, M., Le Bras, G., Robineau, S., Béraud-Dufour, S., Antony, B., and Chardin, P. (1998). Structure of the Sec7 domain of the Arf exchange factor ARNO. *Nature* **392**, 101–105.
- Christis, C., and Munro, S. (2012). The small G protein Arl1 directs the trans-Golgi-specific targeting of the Arf1 exchange factors BIG1 and BIG2. *J. Cell Biol.* **196**, 327–335.
- De la Mora-Rey, T., Guenther, B.D., and Finzel, B.C. (2013). The structure of the TOG-like domain of *Drosophila melanogaster* Mast/Orbit. *Acta Crystallogr. Sect. F Struct. Biol. Cryst. Commun.* **69**, 723–729.
- Donaldson, J.G., and Jackson, C.L. (2011). ARF family G proteins and their regulators: roles in membrane transport, development and disease. *Nat. Rev. Mol. Cell Biol.* **12**, 362–375.
- Efe, J.A., Plattner, F., Hulo, N., Kressler, D., Emr, S.D., and Deloche, O. (2005). Yeast Mon2p is a highly conserved protein that functions in the cytoplasm-to-vacuole transport pathway and is required for Golgi homeostasis. *J. Cell Sci.* **118**, 4751–4764.
- Emsley, P., Lohkamp, B., Scott, W.G., and Cowtan, K. (2010). Features and development of Coot. *Acta Crystallogr. D Biol. Crystallogr.* **66**, 486–501.
- Gillingham, A.K., and Munro, S. (2007). The small G proteins of the Arf family and their regulators. *Annu. Rev. Cell Dev. Biol.* **23**, 579–611.
- Gillingham, A.K., Pfeifer, A.C., and Munro, S. (2002). CASP, the alternatively spliced product of the gene encoding the CCAAT-displacement protein transcription factor, is a Golgi membrane protein related to giantin. *Mol. Biol. Cell* **13**, 3761–3774.
- Gillingham, A.K., Whyte, J.R.C., Panic, B., and Munro, S. (2006). Mon2, a relative of large Arf exchange factors, recruits Dop1 to the Golgi apparatus. *J. Biol. Chem.* **281**, 2273–2280.
- Grebe, M., Gadea, J., Steinmann, T., Kientz, M., Rahfeld, J.U., Salchert, K., Koncz, C., and Jürgens, G. (2000). A conserved domain of the *Arabidopsis* GNOM protein mediates subunit interaction and cyclophilin 5 binding. *Plant Cell* **12**, 343–356.
- Hanzal-Bayer, M., Renault, L., Roversi, P., Wittinghofer, A., and Hillig, R.C. (2002). The complex of Arl2-GTP and PDE delta: from structure to function. *EMBO J.* **21**, 2095–2106.
- Hildebrand, A., Remmert, M., Biegert, A., and Söding, J. (2009). Fast and accurate automatic structure prediction with HHpred. *Proteins* **77** (Suppl 9), 128–132.
- Hutagalung, A.H., and Novick, P.J. (2011). Role of Rab GTPases in membrane traffic and cell physiology. *Physiol. Rev.* **91**, 119–149.
- Jackson, C.L., and Bouvet, S. (2014). Arfs at a glance. *J. Cell Sci.* **127**, 4103–4109.
- Jones, S., Jedd, G., Kahn, R.A., Franzusoff, A., Bartolini, F., and Segev, N. (1999). Genetic interactions in yeast between Ypt GTPases and Arf guanine nucleotide exchangers. *Genetics* **152**, 1543–1556.
- Kabsch, W. (2010). Integration, scaling, space-group assignment and post-refinement. *Acta Crystallogr. D Biol. Crystallogr.* **66**, 133–144.
- Khan, A.R., and Ménétreay, J. (2013). Structural biology of Arf and Rab GTPases' effector recruitment and specificity. *Structure* **21**, 1284–1297.
- Klausner, R.D., Donaldson, J.G., and Lippincott-Schwartz, J. (1992). Brefeldin A: insights into the control of membrane traffic and organelle structure. *J. Cell Biol.* **116**, 1071–1080.
- Landau, M., Mayrose, I., Rosenberg, Y., Glaser, F., Martz, E., Pupko, T., and Ben-Tal, N. (2005). ConSurf 2005: the projection of evolutionary conservation scores of residues on protein structures. *Nucleic Acids Res.* **33**, W299–W302.
- Li, H., Wei, S., Cheng, K., Gounko, N.V., Ericksen, R.E., Xu, A., Hong, W., and Han, W. (2014). BIG3 inhibits insulin granule biogenesis and insulin secretion. *EMBO Rep.* **15**, 714–722.
- Lu, L., Horstmann, H., Ng, C., and Hong, W. (2001). Regulation of Golgi structure and function by ARF-like protein 1 (Arl1). *J. Cell Sci.* **114**, 4543–4555.
- Man, Z., Kondo, Y., Koga, H., Umino, H., Nakayama, K., and Shin, H.W. (2011). Arfaptins are localized to the trans-Golgi by interaction with Arl1, but not Arfs. *J. Biol. Chem.* **286**, 11569–11578.
- Mansour, S.J., Skaug, J., Zhao, X.H., Giordano, J., Scherer, S.W., and Melançon, P. (1999). p200 ARF-GEP1: a Golgi-localized guanine nucleotide exchange protein whose Sec7 domain is targeted by the drug brefeldin A. *Proc. Natl. Acad. Sci. USA* **96**, 7968–7973.
- McCoy, A.J., Grosse-Kunstleve, R.W., Adams, P.D., Winn, M.D., Storoni, L.C., and Read, R.J. (2007). Phaser crystallographic software. *J. Appl. Cryst.* **40**, 658–674.
- McDonold, C.M., and Fromme, J.C. (2014). Four GTPases differentially regulate the Sec7 Arf-GEF to direct traffic at the trans-golgi network. *Dev. Cell* **30**, 759–767.
- Mizuno-Yamasaki, E., Rivera-Molina, F., and Novick, P. (2012). GTPase networks in membrane traffic. *Annu. Rev. Biochem.* **81**, 637–659.



- Monetta, P., Slavin, I., Romero, N., and Alvarez, C. (2007). Rab1b interacts with GBF1 and modulates both ARF1 dynamics and COPI association. *Mol. Biol. Cell* 18, 2400–2410.
- Mossessova, E., Gulbis, J.M., and Goldberg, J. (1998). Structure of the guanine nucleotide exchange factor Sec7 domain of human arno and analysis of the interaction with ARF GTPase. *Cell* 92, 415–423.
- Mouratou, B., Biou, V., Joubert, A., Cohen, J., Shields, D.J., Geldner, N., Jürgens, G., Melançon, P., and Cherfilis, J. (2005). The domain architecture of large guanine nucleotide exchange factors for the small GTP-binding protein Arf. *BMC Genomics* 6, 20.
- Nakamura, K., Man, Z., Xie, Y., Hanai, A., Makyio, H., Kawasaki, M., Kato, R., Shin, H.W., Nakayama, K., and Wakatsuki, S. (2012). Structural basis for membrane binding specificity of the Bin/Amphiphysin/Rvs (BAR) domain of Arfaptin-2 determined by Arl1 GTPase. *J. Biol. Chem.* 287, 25478–25489.
- O’Neal, C.J., Jobling, M.G., Holmes, R.K., and Hol, W.G.J. (2005). Structural basis for the activation of cholera toxin by human ARF6-GTP. *Science* 309, 1093–1096.
- Paczkowski, J.E., Richardson, B.C., and Fromme, J.C. (2015). Cargo adaptors: structures illuminate mechanisms regulating vesicle biogenesis. *Trends Cell Biol.* 25, 408–416.
- Panic, B., Perisic, O., Veprintsev, D.B., Williams, R.L., and Munro, S. (2003a). Structural basis for Arl1-dependent targeting of homodimeric GRIP domains to the Golgi apparatus. *Mol. Cell* 12, 863–874.
- Panic, B., Whyte, J.R., and Munro, S. (2003b). The ARF-like GTPases Arl1p and Arl3p act in a pathway that interacts with vesicle-tethering factors at the Golgi apparatus. *Curr. Biol.* 13, 405–410.
- Pasqualato, S., Renault, L., and Cherfilis, J. (2002). Arf, Arl, Arp and Sar proteins: a family of GTP-binding proteins with a structural device for ‘front-back’ communication. *EMBO Rep.* 3, 1035–1041.
- Perica, T., Kondo, Y., Tiwari, S.P., McLaughlin, S.H., Kemplen, K.R., Zhang, X., Steward, A., Reuter, N., Clarke, J., and Teichmann, S.A. (2014). Evolution of oligomeric state through allosteric pathways that mimic ligand binding. *Science* 346, 1254346.
- Powell, H.R., Johnson, O., and Leslie, A.G. (2013). Autoindexing diffraction images with iMosflm. *Acta Crystallogr. D Biol. Crystallogr.* 69, 1195–1203.
- Ramaen, O., Joubert, A., Simister, P., Belgareh-Touzé, N., Olivares-Sanchez, M.C., Zeeh, J.C., Chantalat, S., Golinelli-Cohen, M.P., Jackson, C.L., Biou, V., and Cherfilis, J. (2007). Interactions between conserved domains within homodimers in the BIG1, BIG2, and GBF1 Arf guanine nucleotide exchange factors. *J. Biol. Chem.* 282, 28834–28842.
- Recacha, R., Boulet, A., Jollivet, F., Monier, S., Houdusse, A., Goud, B., and Khan, A.R. (2009). Structural basis for recruitment of Rab6-interacting protein 1 to Golgi via a RUN domain. *Structure* 17, 21–30.
- Richardson, B.C., McDonold, C.M., and Fromme, J.C. (2012). The Sec7 Arf-GEF is recruited to the trans-Golgi network by positive feedback. *Dev. Cell* 22, 799–810.
- Richardson, B.C., Halaby, S.L., Gustafson, M.A., and Fromme, J.C. (2016). The Sec7 N-terminal regulatory domains facilitate membrane-proximal activation of the Arf1 GTPase. *eLife* 5, e12411.
- Sáenz, J.B., Sun, W.J., Chang, J.W., Li, J., Bursulaya, B., Gray, N.S., and Haslam, D.B. (2009). Golgicide A reveals essential roles for GBF1 in Golgi assembly and function. *Nat. Chem. Biol.* 5, 157–165.
- Sheen, V.L., Ganesh, V.S., Topcu, M., Sebire, G., Bodell, A., Hill, R.S., Grant, P.E., Shugart, Y.Y., Imitola, J., Khoury, S.J., et al. (2004). Mutations in ARFGEF2 implicate vesicle trafficking in neural progenitor proliferation and migration in the human cerebral cortex. *Nat. Genet.* 36, 69–76.
- Shiba, T., Kawasaki, M., Takatsu, H., Nogi, T., Matsugaki, N., Igarashi, N., Suzuki, M., Kato, R., Nakayama, K., and Wakatsuki, S. (2003). Molecular mechanism of membrane recruitment of GGA by ARF in lysosomal protein transport. *Nat. Struct. Biol.* 10, 386–393.
- Togawa, A., Morinaga, N., Ogasawara, M., Moss, J., and Vaughan, M. (1999). Purification and cloning of a brefeldin A-inhibited guanine nucleotide-exchange protein for ADP-ribosylation factors. *J. Biol. Chem.* 274, 12308–12315.
- Winn, M.D., Ballard, C.C., Cowtan, K.D., Dodson, E.J., Emsley, P., Evans, P.R., Keegan, R.M., Krissinel, E.B., Leslie, A.G., McCoy, A., et al. (2011). Overview of the CCP4 suite and current developments. *Acta Crystallogr. D Biol. Crystallogr.* 67, 235–242.
- Wong, M., and Munro, S. (2014). Membrane trafficking. The specificity of vesicle traffic to the Golgi is encoded in the golgin coiled-coil proteins. *Science* 346, 1256898.
- Wright, J., Kahn, R.A., and Sztul, E. (2014). Regulating the large Sec7 Arf guanine nucleotide exchange factors: the when, where and how of activation. *Cell. Mol. Life Sci.* 71, 3419–3438.
- Wu, M., Lu, L., Hong, W., and Song, H. (2004). Structural basis for recruitment of GRIP domain golgin-245 by small GTPase Arl1. *Nat. Struct. Mol. Biol.* 11, 86–94.
- Zhang, T., Li, S., Zhang, Y., Zhong, C., Lai, Z., and Ding, J. (2009). Crystal structure of the ARL2-GTP-BART complex reveals a novel recognition and binding mode of small GTPase with effector. *Structure* 17, 602–610.
- Zhao, X., Lasell, T.K.R., and Melançon, P. (2002). Localization of large ADP-ribosylation factor-guanine nucleotide exchange factors to different Golgi compartments: evidence for distinct functions in protein traffic. *Mol. Biol. Cell* 13, 119–133.

Cell Reports, Volume 16

## Supplemental Information

### **Structural Insights into Arl1-Mediated Targeting of the Arf-GEF BIG1 to the *trans*-Golgi**

**Antonio Galindo, Nicolas Soler, Stephen H. McLaughlin, Minmin Yu, Roger L. Williams, and Sean Munro**

**A**

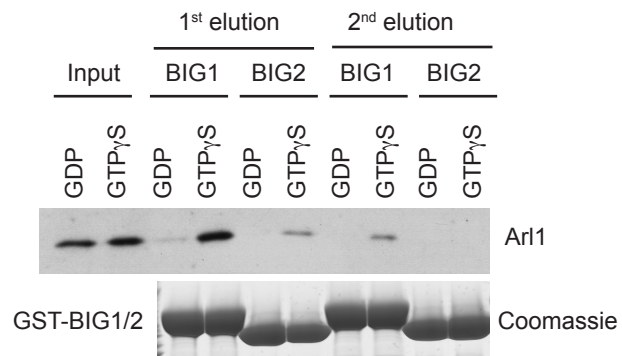

**B**

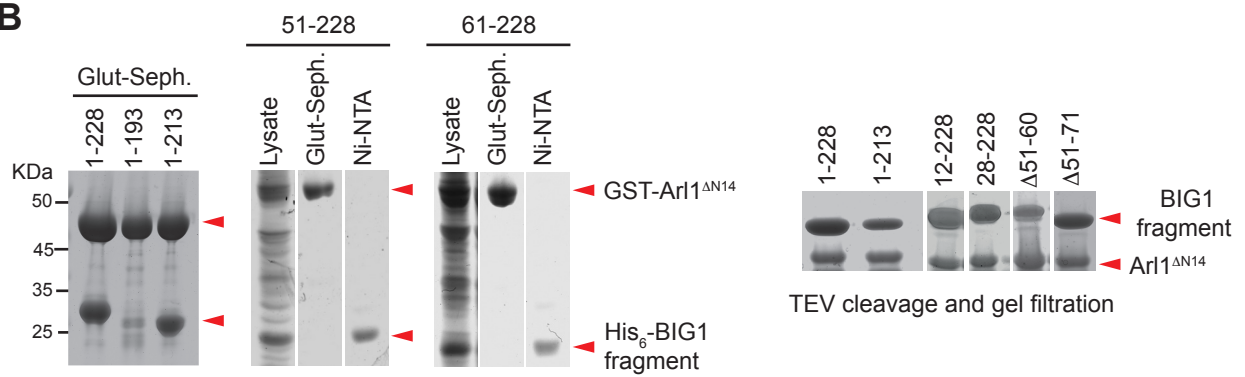

Figure S2

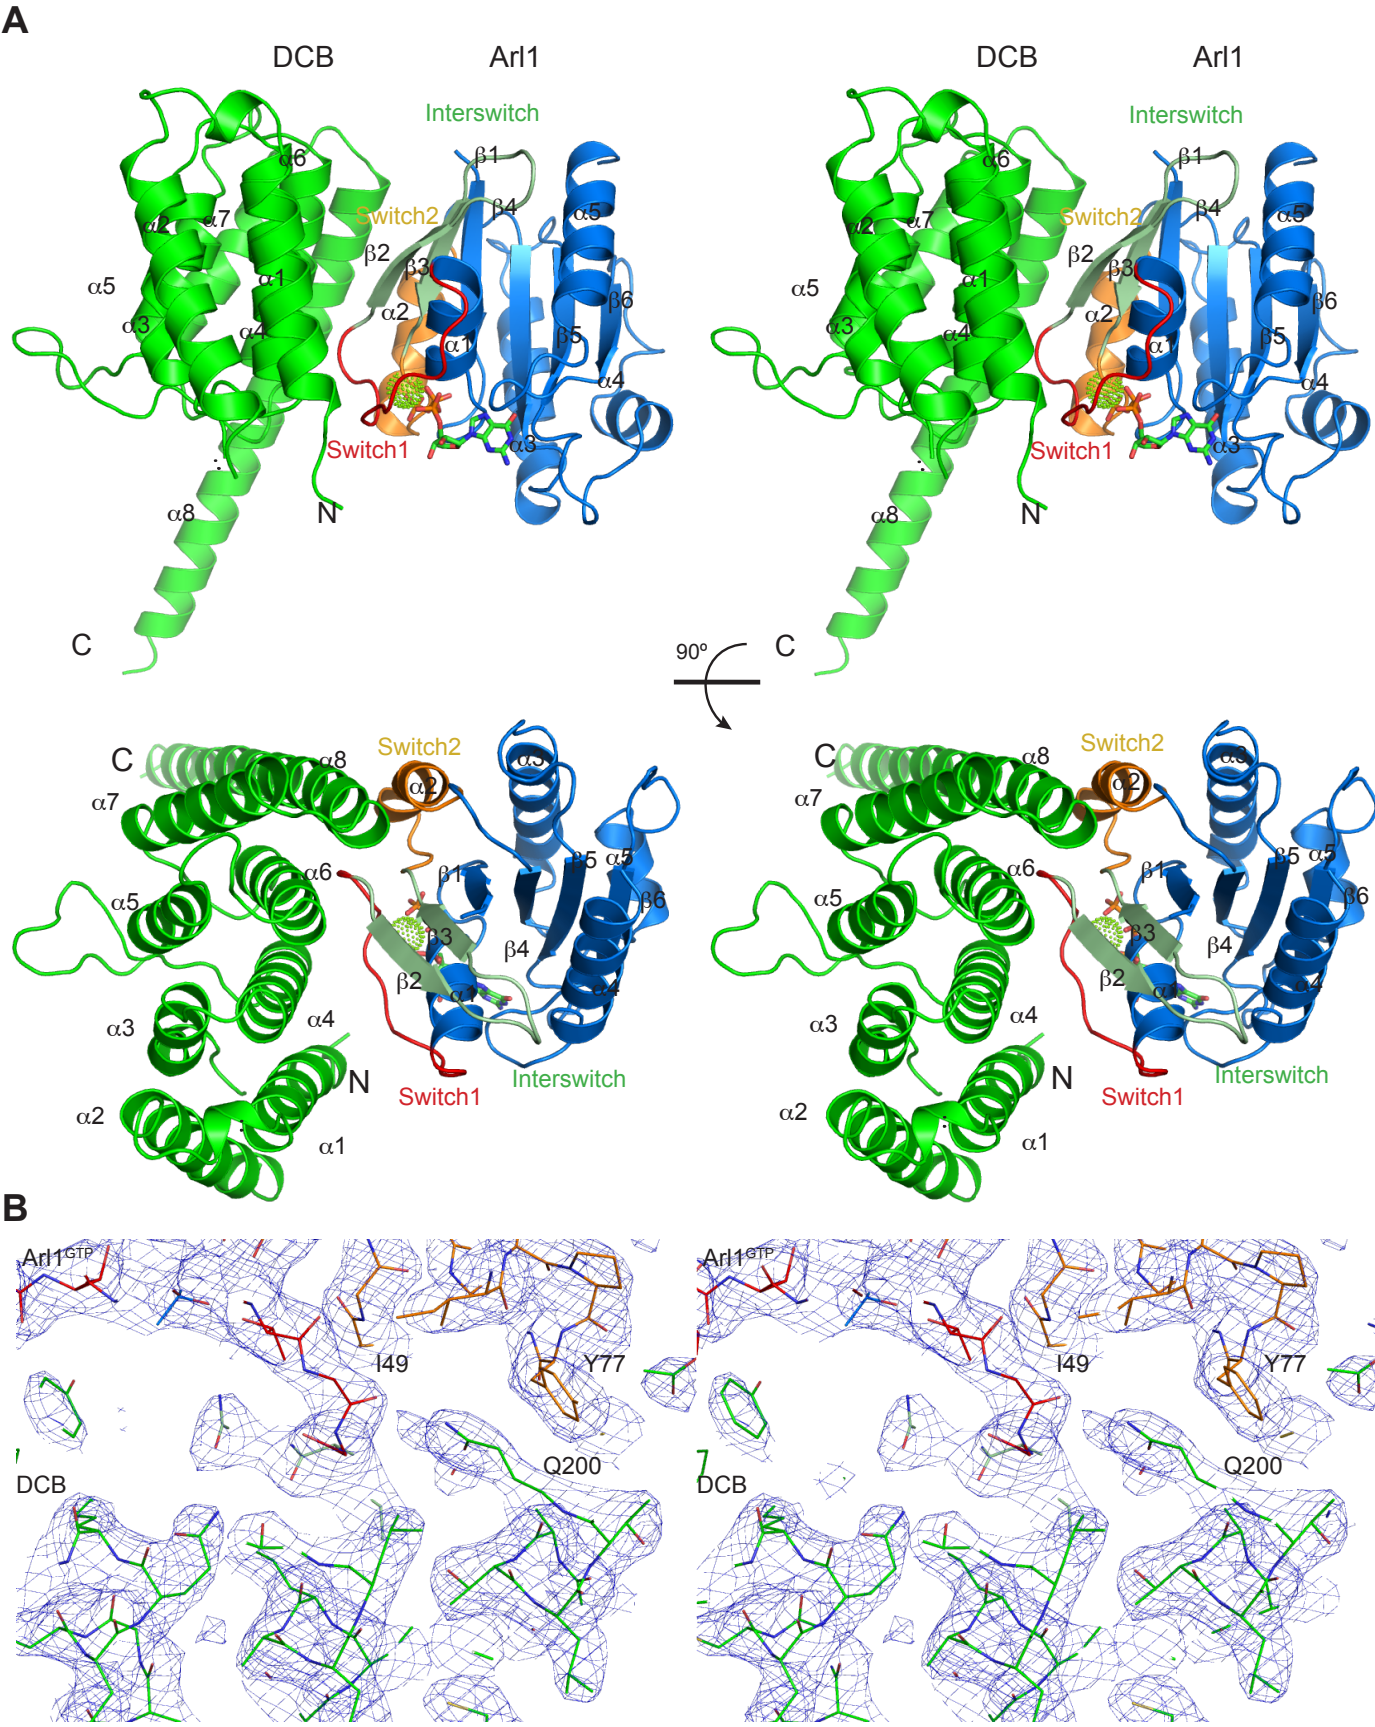



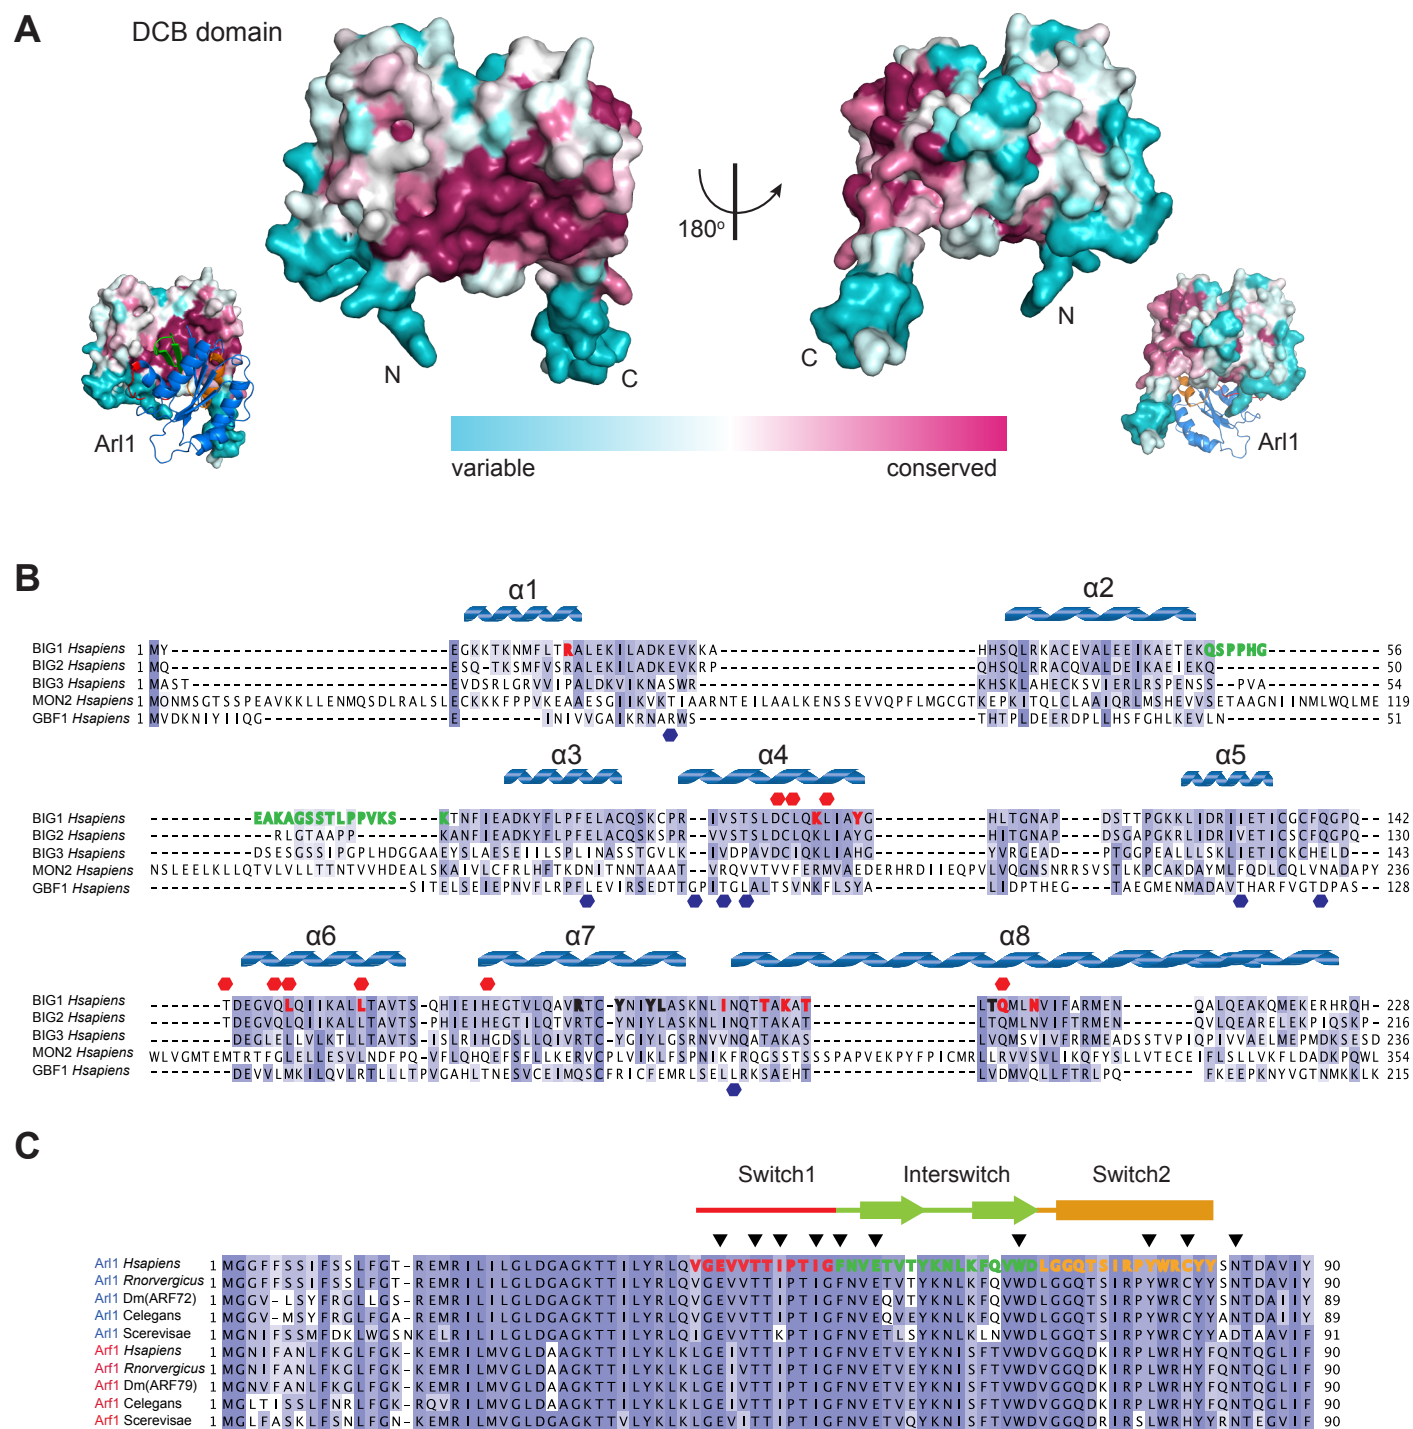

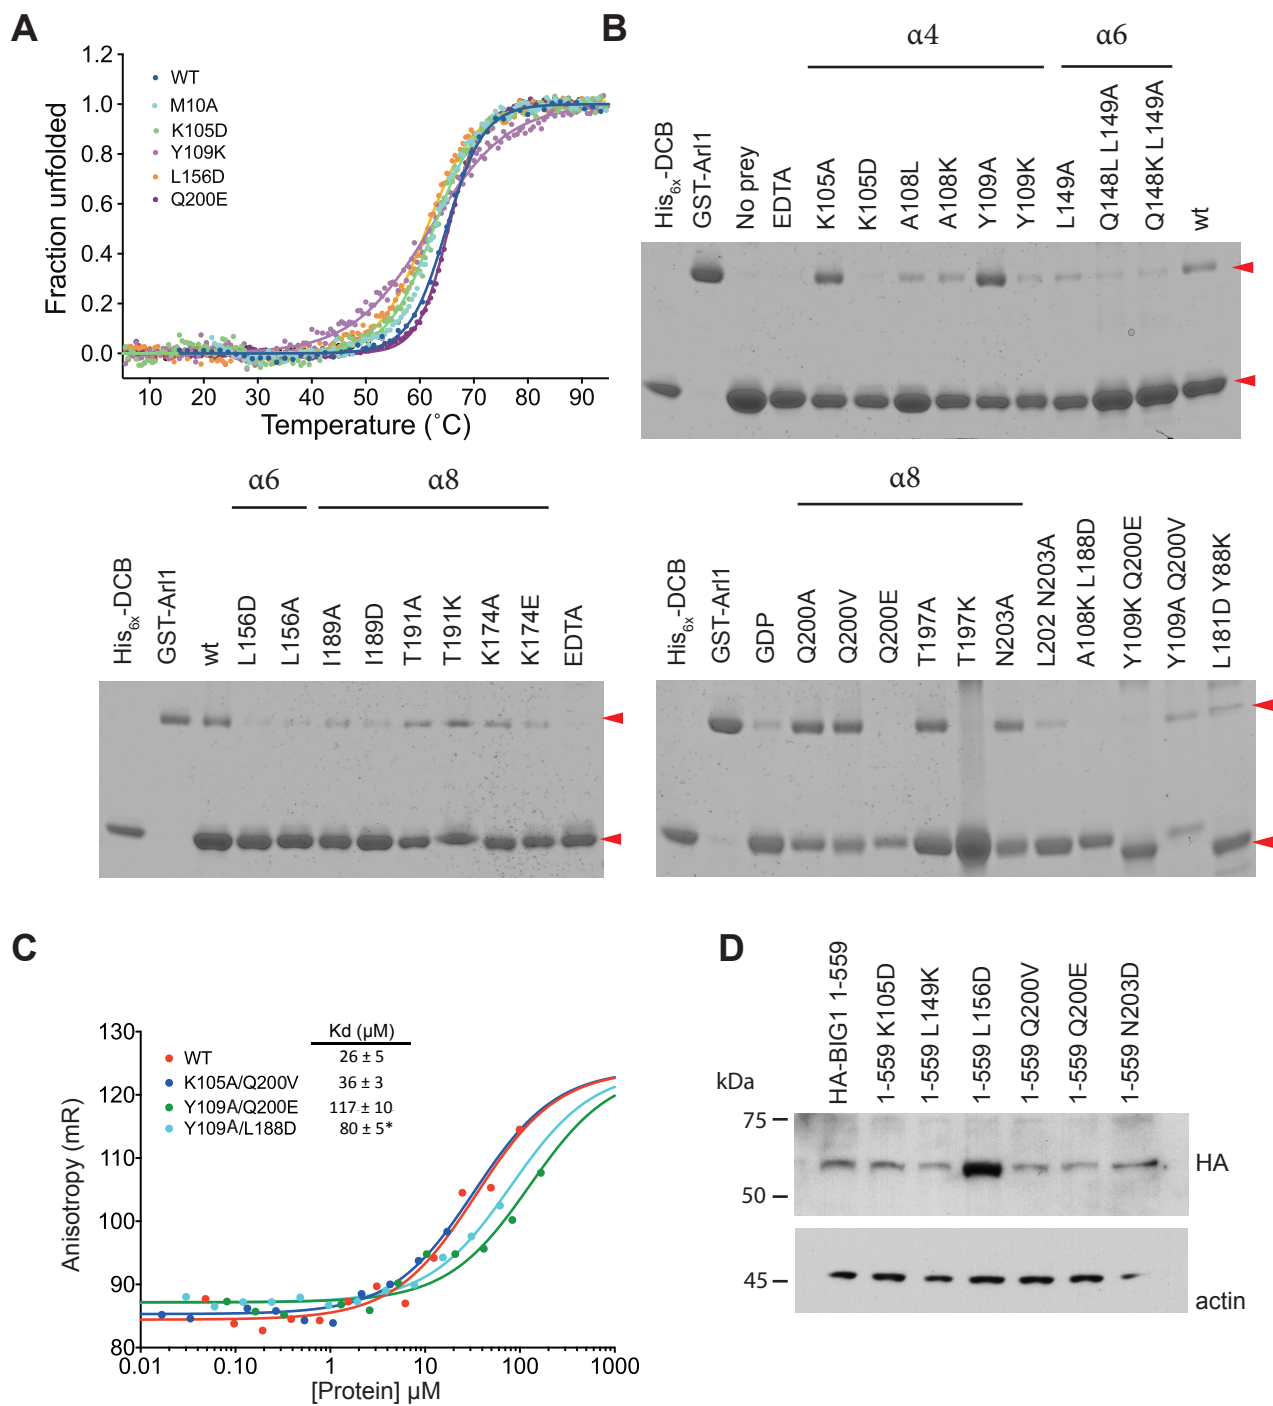

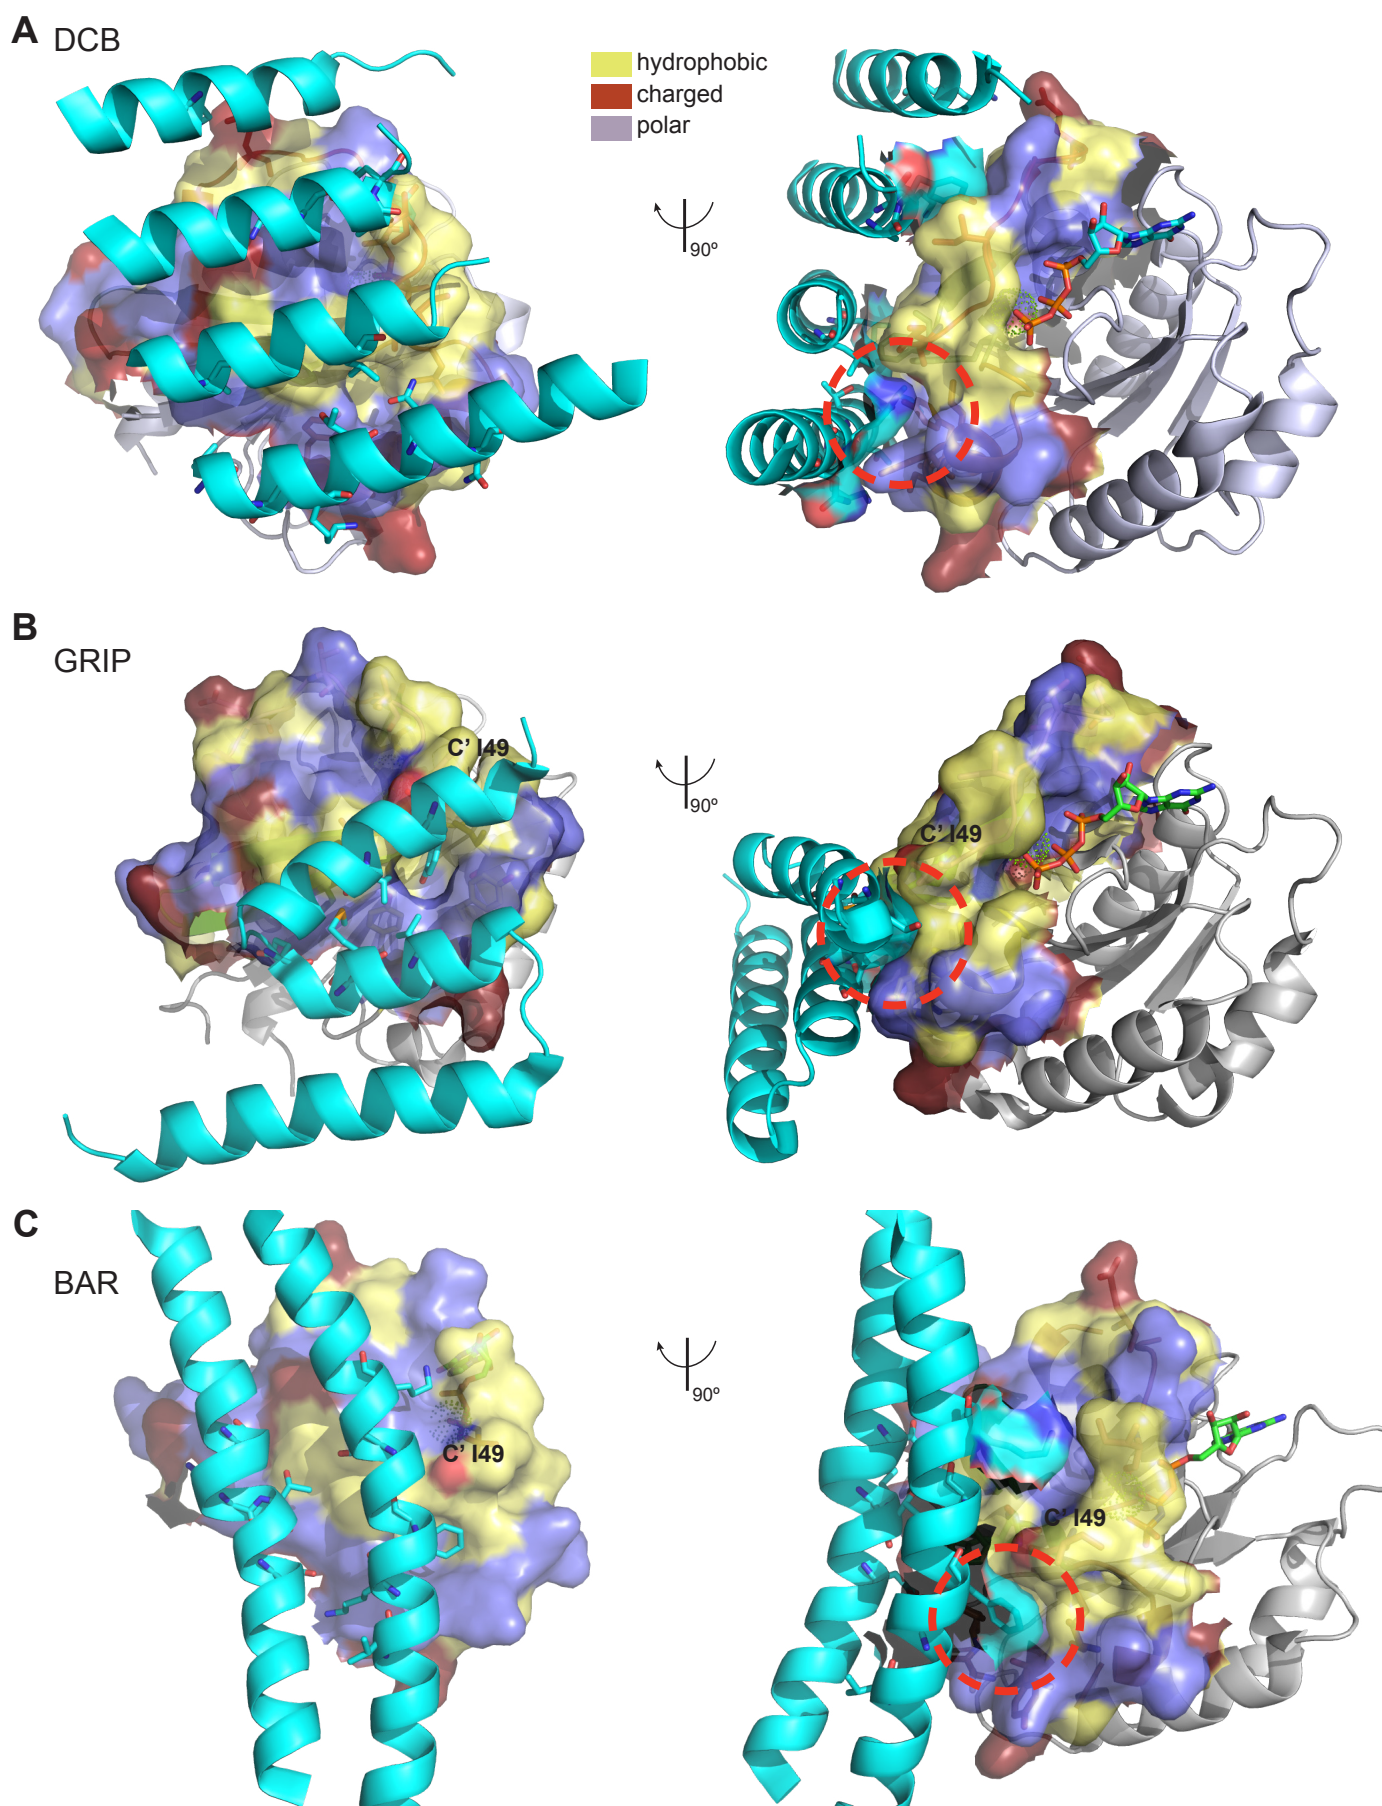

**Figure S1. Mapping of the region of BIG1 that binds to Arl1, Related to Figure 1.**

(A) Arl1 from GTP $\gamma$ S-containing cell lysates binds to the DCB domain from BIG1 and BIG2. HeLa cell lysates were supplemented with 10 mM EDTA and 0.2 mM GTP $\gamma$ S or GDP and incubated at 30°C for 20 minutes. After addition of 60 mM MgCl<sub>2</sub> the lysates were incubated at 4°C with glutathione-Sepharose beads coated with GST-DCB<sup>BIG1</sup> or GST-DCB<sup>BIG2</sup>. Bound material was eluted with 2 M NaCl and immuno-blotted for Arl1.

(B) Coomassie-stained gels of GST-Arl1<sup>GTP</sup>/BIG1<sup>N-terminal</sup> complexes purified by affinity chromatography and, where indicated, TEV cleavage and gel filtration. A fragment comprising residues 1-228 bound to Arl1<sup>GTP</sup>, as did a C-terminal truncation to residue 213, but not to residue 193. N-terminal truncations to residues 12 or 28 could still bind, but removal of the first 51 or 61 residues prevented binding. Removal of a disordered loop between residues 51 and 71 (inclusive) from the 1-228 fragment did not prevent the formation of the complex.



**Figure S2. The human Arl1<sup>GTP</sup>/DCB<sup>Δ51-71</sup> complex in stereo, Related to Figure 3.**

(A) Stereo views of a ribbon diagram of the Arl1<sup>Q71L-GTP</sup>/Mg<sup>+2</sup>/DCB<sup>Δ51-71</sup> complex. Views are rotated 90° degrees with respect to each other. The DCB<sup>Δ51-71</sup> domain is colored in green. Arl1 is shown in blue, with switch 1 colored red, interswitch in pale green and switch 2 in orange.

The GTP molecule is shown as sticks with the Mg<sup>2+</sup> ion as a sphere of green dots.

(B) Stereo view of a representative portion of the  $2F_o-F_c$  electron density map (contoured at 2.0  $\sigma$ ). The map is centered on the Arl1<sup>GTP</sup>-DCB<sup>BIG1</sup> interface. The modeled structure is shown as sticks and colored as in (A). Also labeled are the residues DCB<sup>BIG1</sup> Gln200 and Arl1 Ile49 and Tyr77.

**Figure S3. Conserved Arl1 binding surface on the BIG1 DCB domain, Related to Figure 3.**

(A) Surface representation of the BIG1 DCB domain colored according to evolutionary conservation. A UniProt search with 35% identity threshold produced 167 sequences as unique BIG1 orthologs, and these were used for ConSurf analysis. The Arl1 interaction surface is indicated in the inset images of the complex with Arl1<sup>GTP</sup> shown as ribbons.

(B) Alignment of the N-terminal region of all five proteins from humans that have a DCB domain: BIG1, BIG2, BIG3, MON2 and GBF1. Conserved residues are colored according to BLOSSUM62 with a 15% conservation threshold for visibility. Conserved residues specific to the BIG family (red dot above) or the GBF family (blue dot below) are indicated along with key residues in the Arl1<sup>GTP</sup>/DCB<sup>BIG1</sup> interface (red bold) and the DCB-DCB interface (black bold), and the secondary structure of the DCB<sup>BIG1</sup> domain.

(C) Sequence alignment of Arl1 orthologs, created as in (B). Switch 1 (red), interswitch (green,  $\beta$ -sheets depicted as arrows), switch 2 (orange), and key residues in the Arl1<sup>GTP</sup>/DCB<sup>BIG1</sup> interface (arrowheads) are indicated.

**Figure S4. Characterization of DCB<sup>BIG1</sup> mutants, Related to Figure 4.**

(A) Analysis of the thermal stability of DCB<sup>BIG1</sup> mutants. The fraction of unfolded protein was determined using circular dichroism (CD). CD melting data were transformed using the fitted baselines from spectral data.

(B) Binding analysis of DCB<sup>BIG1</sup> mutants. Ni-NTA beads loaded with His<sub>6</sub>-DCB<sup>BIG1</sup> variants were mixed with GST-Arl1<sup>ΔN14-GTP</sup>. Bound material was analyzed by SDS-PAGE and Coomassie staining.

(C) Determination of the dissociation constant of the Arl1<sup>GTP</sup>/DCB<sup>BIG1</sup> complex by fluorescence anisotropy. Arl1<sup>GTP</sup> was labeled with NT-495 and mixed with wild type DCB<sup>BIG1</sup> or the indicated double mutants. Fitting to a 1:1 binding model is shown by a solid curve.

(D) Immunoblots from transiently transfected HeLa cells expressing wild-type or mutant versions of the HA-BIG1<sup>1-559</sup> construct, and probed for the HA epitope tag or for actin as a loading control.

**Figure S5. Binding surfaces in Arl1-effector complexes, Related to Figure 6.**

(A) Two views of the Arl1<sup>GTP</sup>/DCB<sup>Δ51-71</sup> complex.  $\alpha$ -helices 1, 4, 6, 8 from the DCB domain are depicted as ribbon diagrams. The key residues involved in the interaction are shown as sticks. The Arl1 switch region is shown as a surface representation with hydrophobic residues in yellow, polar residues in purple and charged residues in brown. GTP is shown in sticks and the Mg<sup>2+</sup> ion as a sphere of green dots.

(B) Two views of the Arl1<sup>GTP</sup>/GRIP<sup>Golgin245</sup> complex with the GRIP domain as a ribbon diagram, coloring as in (A).

(C) Two views of the Arl1<sup>GTP</sup>/BAR<sup>Arfaptin2</sup> complex colored as in (A).

The Ile49 carbonyl group (C' I49) is highlighted in red in the three complexes, and the hydrophobic pocket is indicated with a red dashed circle.

Table S1 Data Collection and Refinement Statistics, Related to Figure 3

|                      |                 | DCB <sup>Δ51-71</sup> -Arl1 <sup>GTP</sup>              |
|----------------------|-----------------|---------------------------------------------------------|
| Data collection      |                 |                                                         |
| Space group          |                 | C121                                                    |
| Unit cell dimensions |                 | a=84.17 Å, b=50.73 Å, c=103.8 Å<br>α=90°, β=112°, γ=90° |
| Resolution (Å)       |                 | 29.05-2.28                                              |
| Rmerge               |                 | 0.048 (0.667)                                           |
| I/σ                  |                 | 12.4 (1.7)                                              |
| Completeness (%)     |                 | 97.3 (94.1)                                             |
| Redundancy           |                 | 3.2 (3.2)                                               |
| Refinement           |                 |                                                         |
| Resolution (Å)       |                 | 29.0-2.28                                               |
| No. of reflections   |                 | 35386                                                   |
| Rwork/Rfree          |                 | 0.2589/0.2170                                           |
| No. of atoms         |                 | 3008                                                    |
|                      | Protein         | 2895                                                    |
|                      | Ligand/ion      | 73                                                      |
|                      | Water           | 40                                                      |
| <i>B</i> -factors    |                 |                                                         |
|                      | Protein         | 67.6                                                    |
|                      | Ligand/ion      | 63.7                                                    |
|                      | Water           | 59.6                                                    |
| Rms deviation        |                 |                                                         |
|                      | Bond length (Å) | 0.01                                                    |
|                      | Bond angles (°) | 1.158                                                   |
| PDB ID               |                 | 5EE5                                                    |

Values in parentheses are for highest-resolution shell
